# Supplementary material for: Metagenomics of Toenail Onychomycosis in Three Victorian Regions of Australia
Source: MDPI journal article supplement (doi:10.3390/jof8111198), 2022-11-14
Supplement: s1 [file s1]

**Table S1** Primers used for sequencing by locus

| Region       | Primers (5' to 3')                                                            |
|--------------|-------------------------------------------------------------------------------|
| ITS2<br>rRNA | ITS3 Forward GCA TCGA TGAAGAACGCAGC<br>ITS4 Reverse TCCTCCGCTTATTGATATGC      |
| 16S<br>rRNA  | Bakt_341 Forward CCTACGGGNGGCWGCAG<br>Bakt_805 Reverse GACTACHVGGGTATCTAATCC. |

**Table S4** Predominant organism percentage of hits, with most likely infecting agent (MLIA).

| Nail Number    | Dermatophyte or<br>NDM                              | % Hits         | MLIA(s)                             |
|----------------|-----------------------------------------------------|----------------|-------------------------------------|
| 1              | <i>T. rubrum</i>                                    | 98.11          | <i>T. rubrum</i>                    |
| 2              | <i>T. rubrum</i>                                    | 95.53          | <i>T. rubrum</i>                    |
| 3              | <i>T. rubrum</i>                                    | 99.93          | <i>T. rubrum</i>                    |
| 4              | <i>T. mentagrophytes</i>                            | 99.13          | <i>T. mentagrophytes</i>            |
| 5              | <i>A.<br/>versicolor</i>                            | 99.4           | <i>Aspergillus<br/>versicolor</i>   |
| 6              | <i>T. mentagrophytes</i>                            | 70.39          | <i>T. mentagrophytes</i>            |
| 7              | <i>T. mentagrophytes</i>                            | 99.45          | <i>T. mentagrophytes</i>            |
| 8              | <i>A.<br/>sclerotigenum</i>                         | 86.27          | <i>Acremonium<br/>sclerotigenum</i> |
| 9              | <i>T. mentagrophytes</i>                            | 90.23          | <i>T. mentagrophytes</i>            |
| 10             | <i>F.<br/>oxysporum</i><br><i>T. mentagrophytes</i> | 86.27<br>12.81 | Mixed                               |
| 11 (Control 1) | <i>F.<br/>oxysporum</i>                             | 95.77          | -                                   |
| 12             | <i>T. mentagrophytes</i>                            | 94.73          | <i>T. mentagrophytes</i>            |
| 13             | <i>T. rubrum</i>                                    | 94.82          | <i>T. rubrum</i>                    |
| 14             | <i>T. rubrum</i>                                    | 98.62          | <i>T. rubrum</i>                    |
| 15             | <i>T. rubrum</i>                                    | 97.77          | <i>T. rubrum</i>                    |
| 16             | <i>T. mentagrophytes</i>                            | 90.43          | <i>T. mentagrophytes</i>            |
| 17             | <i>T. mentagrophytes</i>                            | 97.63          | <i>T. mentagrophytes</i>            |
| 18             | <i>T. rubrum</i>                                    | 83.8           | <i>T. rubrum</i>                    |
| 19             | <i>F. acetilerea</i><br><i>T. mentagrophytes</i>    | 51.92<br>47.55 | Mixed                               |
| 20 (Control 2) | <i>M. slooffiae</i>                                 | 93.57          | -                                   |

**Table S5** Nails with both *T. rubrum* and *T. mentagrophytes* present and showing the dominance of one dermatophyte over the other

| Nail Number    | Dermatophyte                                 | % Hits        |
|----------------|----------------------------------------------|---------------|
| 1              | <i>T. rubrum</i><br><i>T. mentagrophytes</i> | 98.11<br>0.65 |
| 4              | <i>T. rubrum</i><br><i>T. mentagrophytes</i> | 0.01<br>99.13 |
| 7              | <i>T. rubrum</i><br><i>T. mentagrophytes</i> | 0.02<br>99.45 |
| 10             | <i>T. rubrum</i><br><i>T. mentagrophytes</i> | 0.01<br>12.81 |
| 11 (Control 1) | <i>T. rubrum</i><br><i>T. mentagrophytes</i> | 0.08<br>0.06  |
| 12             | <i>T. rubrum</i><br><i>T. mentagrophytes</i> | 0.02<br>94.73 |

**Table S6** Correlations between results of sequencing the 16S region in DNA from nails.

| Correlations | Nail 1       | Nail 2       | Nail 3       | Nail 4       | Nail 5       | Nail 6       | Nail 7       | Nail 8       | Nail 9       | Nail 10      | Nail 11      | Nail 12      | Nail 13      | Nail 14      | Nail 15      | Nail 16      | Nail 17      | Nail 18      | Nail 19 |
|--------------|--------------|--------------|--------------|--------------|--------------|--------------|--------------|--------------|--------------|--------------|--------------|--------------|--------------|--------------|--------------|--------------|--------------|--------------|---------|
| Nail 2       | <b>0.917</b> |              |              |              |              |              |              |              |              |              |              |              |              |              |              |              |              |              |         |
| Nail 3       | <b>0.788</b> | <b>0.917</b> |              |              |              |              |              |              |              |              |              |              |              |              |              |              |              |              |         |
| Nail 4       | <b>0.904</b> | <b>0.99</b>  | <b>0.937</b> |              |              |              |              |              |              |              |              |              |              |              |              |              |              |              |         |
| Nail 5       | <b>0.796</b> | <b>0.923</b> | <b>1</b>     | <b>0.943</b> |              |              |              |              |              |              |              |              |              |              |              |              |              |              |         |
| Nail 6       | <b>0.573</b> | <b>0.662</b> | <b>0.727</b> | <b>0.678</b> | <b>0.729</b> |              |              |              |              |              |              |              |              |              |              |              |              |              |         |
| Nail 7       | <b>0.823</b> | <b>0.943</b> | <b>0.996</b> | <b>0.964</b> | <b>0.997</b> | <b>0.723</b> |              |              |              |              |              |              |              |              |              |              |              |              |         |
| Nail 8       | <b>0.867</b> | <b>0.921</b> | <b>0.815</b> | <b>0.894</b> | <b>0.824</b> | <b>0.649</b> | <b>0.838</b> |              |              |              |              |              |              |              |              |              |              |              |         |
| Nail 9       | <b>0.851</b> | <b>0.953</b> | <b>0.97</b>  | <b>0.976</b> | <b>0.975</b> | <b>0.723</b> | <b>0.984</b> | <b>0.894</b> |              |              |              |              |              |              |              |              |              |              |         |
| Nail 10      | <b>0.78</b>  | <b>0.908</b> | <b>0.987</b> | <b>0.928</b> | <b>0.987</b> | <b>0.72</b>  | <b>0.983</b> | <b>0.815</b> | <b>0.966</b> |              |              |              |              |              |              |              |              |              |         |
| Nail 11      | <b>0.831</b> | <b>0.945</b> | <b>0.985</b> | <b>0.967</b> | <b>0.989</b> | <b>0.733</b> | <b>0.993</b> | <b>0.878</b> | <b>0.994</b> | <b>0.975</b> |              |              |              |              |              |              |              |              |         |
| Nail 12      | <b>0.909</b> | <b>0.969</b> | <b>0.87</b>  | <b>0.984</b> | <b>0.88</b>  | <b>0.638</b> | <b>0.911</b> | <b>0.896</b> | <b>0.949</b> | <b>0.869</b> | <b>0.928</b> |              |              |              |              |              |              |              |         |
| Nail 13      | <b>0.895</b> | <b>0.956</b> | <b>0.929</b> | <b>0.971</b> | <b>0.935</b> | <b>0.696</b> | <b>0.951</b> | <b>0.922</b> | <b>0.982</b> | <b>0.921</b> | <b>0.967</b> | <b>0.96</b>  |              |              |              |              |              |              |         |
| Nail 14      | <b>0.787</b> | <b>0.917</b> | <b>1</b>     | <b>0.937</b> | <b>1</b>     | <b>0.731</b> | <b>0.996</b> | <b>0.815</b> | <b>0.97</b>  | <b>0.987</b> | <b>0.985</b> | <b>0.87</b>  | <b>0.929</b> |              |              |              |              |              |         |
| Nail 15      | <b>0.861</b> | <b>0.964</b> | <b>0.976</b> | <b>0.987</b> | <b>0.98</b>  | <b>0.708</b> | <b>0.992</b> | <b>0.857</b> | <b>0.99</b>  | <b>0.966</b> | <b>0.99</b>  | <b>0.954</b> | <b>0.968</b> | <b>0.976</b> |              |              |              |              |         |
| Nail 16      | <b>0.885</b> | <b>0.926</b> | <b>0.802</b> | <b>0.952</b> | <b>0.814</b> | <b>0.578</b> | <b>0.855</b> | <b>0.824</b> | <b>0.897</b> | <b>0.798</b> | <b>0.869</b> | <b>0.986</b> | <b>0.915</b> | <b>0.802</b> | <b>0.913</b> |              |              |              |         |
| Nail 17      | <b>0.911</b> | <b>0.971</b> | <b>0.908</b> | <b>0.988</b> | <b>0.917</b> | <b>0.674</b> | <b>0.941</b> | <b>0.911</b> | <b>0.972</b> | <b>0.908</b> | <b>0.958</b> | <b>0.991</b> | <b>0.976</b> | <b>0.908</b> | <b>0.972</b> | <b>0.963</b> |              |              |         |
| Nail 18      | <b>0.864</b> | <b>0.963</b> | <b>0.972</b> | <b>0.987</b> | <b>0.977</b> | <b>0.707</b> | <b>0.989</b> | <b>0.867</b> | <b>0.994</b> | <b>0.965</b> | <b>0.99</b>  | <b>0.957</b> | <b>0.975</b> | <b>0.972</b> | <b>0.998</b> | <b>0.915</b> | <b>0.974</b> |              |         |
| Nail 19      | 0.334        | 0.281        | 0.115        | 0.251        | 0.121        | 0.067        | 0.148        | 0.288        | 0.177        | 0.115        | 0.157        | 0.287        | 0.224        | 0.114        | 0.187        | 0.3          | 0.262        | 0.191        |         |
| Nail 20      | <b>0.801</b> | <b>0.927</b> | <b>0.999</b> | <b>0.947</b> | <b>1</b>     | <b>0.727</b> | <b>0.998</b> | <b>0.824</b> | <b>0.976</b> | <b>0.987</b> | <b>0.989</b> | <b>0.885</b> | <b>0.937</b> | <b>0.999</b> | <b>0.983</b> | <b>0.821</b> | <b>0.921</b> | <b>0.979</b> | 0.127   |

**Bold**=significant correlation.
