# Supplementary material for: Metagenomics of Toenail Onychomycosis in Three Victorian Regions of Australia
Source: MDPI journal article supplement (doi:10.3390/jof8111198), 2022-11-14
Supplement: s1 [file s1]

## Supplementary Figures

| Sample number | Clinical label | Geographic location | Clinical diagnosis /description                                       | Age in years and Gender | Clinical Appearance                                                                   |
|---------------|----------------|---------------------|-----------------------------------------------------------------------|-------------------------|---------------------------------------------------------------------------------------|
| 1             | BC1            | Bass Coast          | Advanced DLSO.<br>Dermatophytomas.<br>Tinea pedis                     | 77 Female               |    |
| 2             | BC2            | Bass Coast          | DLSO.<br>Dermatophytomas.<br>Tinea pedis                              | 87 Female               |    |
| 3             | BC3            | Bass Coast          | DLSO.<br>Dermatophytomas.<br>Tinea pedis.<br>Surrounding inflammation | 71 Female               |   |
| 4             | BC4            | Bass Coast          | DLSO.<br>Dermatophytomas.<br>Tinea pedis                              | 77 Female               |  |
| 5             | SJ1            | Melbourne           | TDO. Multiple<br>nails. Tinea pedis                                   | 70s<br>Female           |  |
| 6             | SJ2            | Melbourne           | DLSO. Limited<br>mild tinea pedis                                     | 90 Female               |  |

|    |                    |            |                                                                     |               |                                                                                       |
|----|--------------------|------------|---------------------------------------------------------------------|---------------|---------------------------------------------------------------------------------------|
| 7  | SJ3                | Melbourne  | DLSO. Distal inflammation                                           | 90s Female    |    |
| 8  | SJ4                | Melbourne  | Restricted DLSO with restricted tinea pedis                         | 80s Male      |    |
| 9  | SJ5                | Melbourne  | Severe DLSO with intact ventral surface. Surrounding inflammation   | 90s Male      |   |
| 10 | SJ6                | Melbourne  | DLSO with matrix involvement. Limited tinea pedis                   | 80s Male      |  |
| 11 | SJC<br>(Control 1) | Melbourne  | Not Available                                                       | Not Available | Not Available                                                                         |
| 12 | SP1                | Shepparton | WSO. Surrounding inflammation                                       | 87 Male       |  |
| 13 | SP2                | Shepparton | Advanced DLSO. Intact ventral surface. Dermatophytomas. Tinea pedis | 55 Female     |  |

|    |      |            |                                                                   |           |                                                                                       |
|----|------|------------|-------------------------------------------------------------------|-----------|---------------------------------------------------------------------------------------|
| 14 | SP3  | Shepparton | TDO. Multiple nail involvement. Tinea pedis                       | 85 Female |    |
| 15 | SP4  | Shepparton | DLSO.<br>Dermatophytomas.<br>Multiple nails<br>Tinea pedis        | 78 Female |    |
| 16 | SP5  | Shepparton | DLSO. Secondary nail SWO. Surrounding inflammation                | 73 Male   |   |
| 17 | SP6  | Shepparton | TDO<br>Dermatophytomas.<br>Cuticle severely infected. Tinea pedis | 59 Male   |  |
| 18 | SP6b | Shepparton | DLSO.<br>Dermatophytomas.<br>Tinea pedis                          | 72 Female |  |
| 19 | SP7  | Shepparton | Great nail TDO.<br>Small nail SWO.<br>Tinea pedis                 | 80 Male   |  |

|         |                                                                           |                                                   |                                                                                |                                                                              |                                                                                     |
|---------|---------------------------------------------------------------------------|---------------------------------------------------|--------------------------------------------------------------------------------|------------------------------------------------------------------------------|-------------------------------------------------------------------------------------|
| 20      | SPC<br>(Control 2)                                                        | Shepparton                                        | Skin inflammation<br>medial side of toe.<br>May be due to<br>cornified lesion. | 73 Female                                                                    |  |
| Summary | 18 diseased<br>2 controls<br>(Melbourne<br>and Bass<br>Coast)<br>Total 20 | 4 Bass<br>Coast 7<br>Melbourne<br>9<br>Shepparton |                                                                                | Mean<br>age*:<br>79 years<br>Gender:<br>Female:<br>12 Male:7<br>Unknown<br>1 |                                                                                     |

**Figure S1** Characteristics of samples used in the study. Nails were classified using the clinical appearance and classified as follows: DLSO: distal subungal onychomycosis. SWO: superficial white onychomycosis. TDO: total dystrophic onychomycosis. \*When the exact age was unknown the midpoint in the decade was used for calculations e.g. 80s becomes 85. Numbers drawn on the toes were solely for the purpose of identification by the contributing podiatrist.

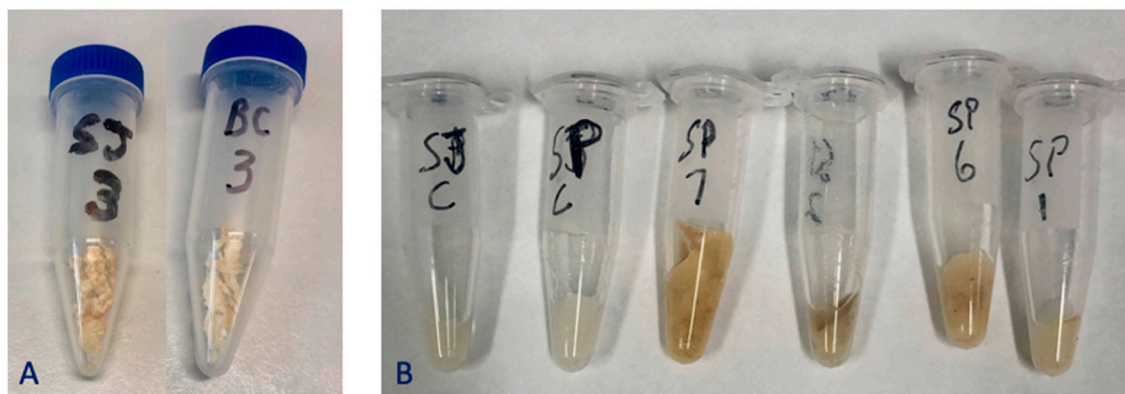

**Figure S2** **A** Typical nail samples provided by podiatrists. Note the crumbling porous nature. **B** Samples after DNA extraction in 1.5 ml Eppendorf tubes. The two controls 11 (SJ) and 20 (SPC) show less pigmentation than infected nails.: 12 (SP1), 13 (SP2), 17 (SP6) and 19 (SP7)

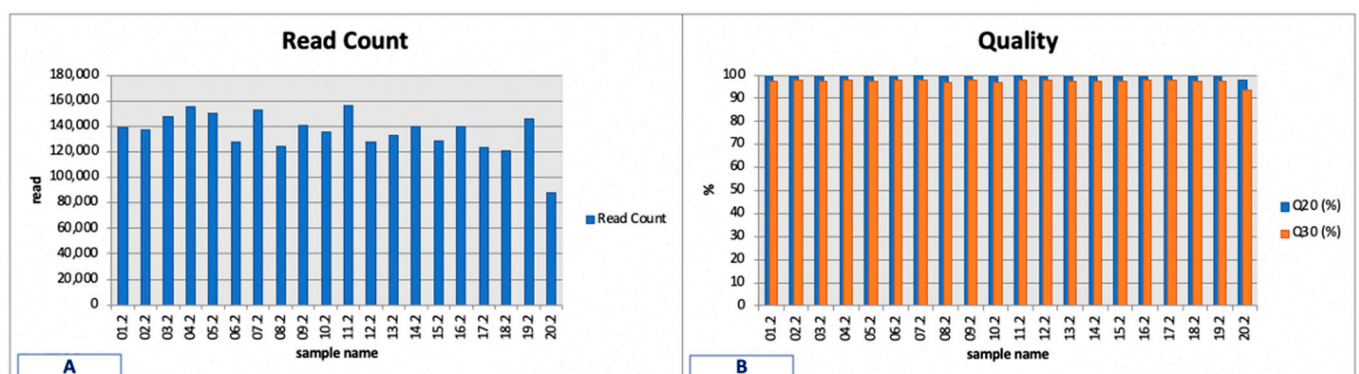

**Figure S3** ITS2. **A** Read Counts **B** Phred scores. Sample read counts and sequence quality for ITS2 data. Read counts and Phred scores were all within the expected range (Reads 50-100K, Phred Q30>70-80%)



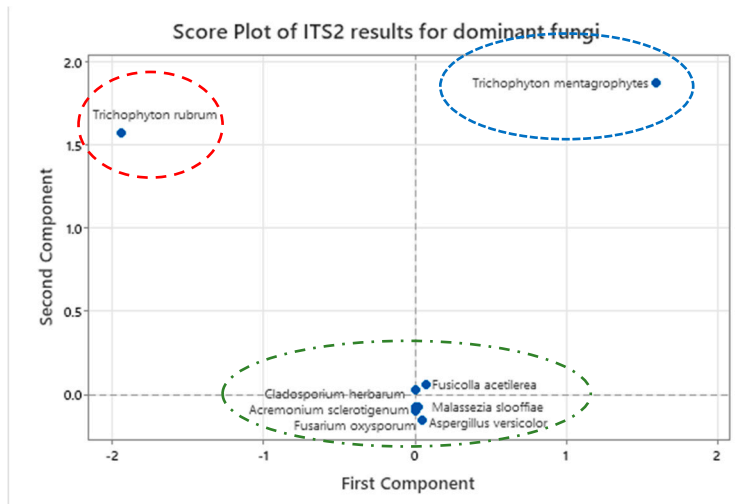

**Figure S4** PCA score plot for high scoring fungi showing three clusters.

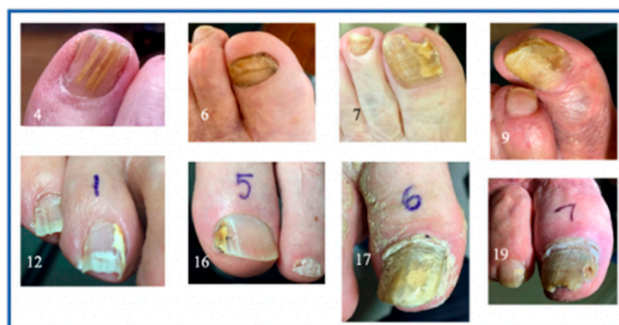

*T. mentagrophytes* as MLIA-clinical appearance

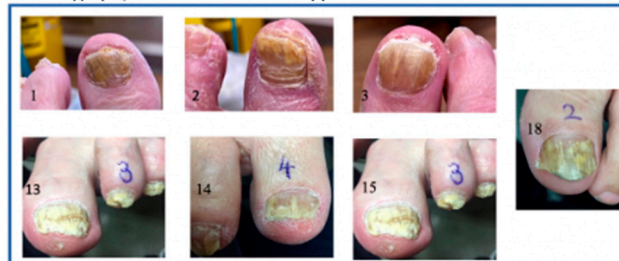

*T. rubrum* as MLIA-clinical appearance

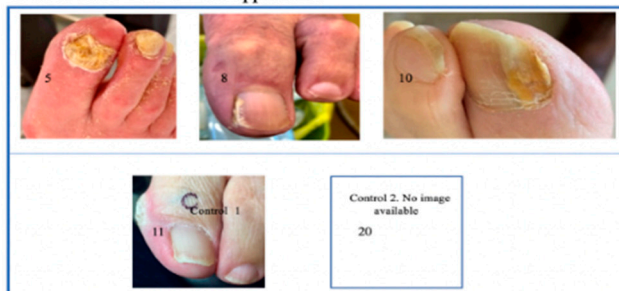

NDMs as MLIA-clinical appearance (5,8 & 10). Controls 11 & 20.

**Figure S5** Clinical appearance of toenails grouped by MLIA. *Trichophyton mentagrophytes* (top), *T. rubrum* (middle) and an NDM (bottom) as the dominant fungus. Mycotic nails are 1-10 and 12-19; control nails are 11 and 20 (not pictured).

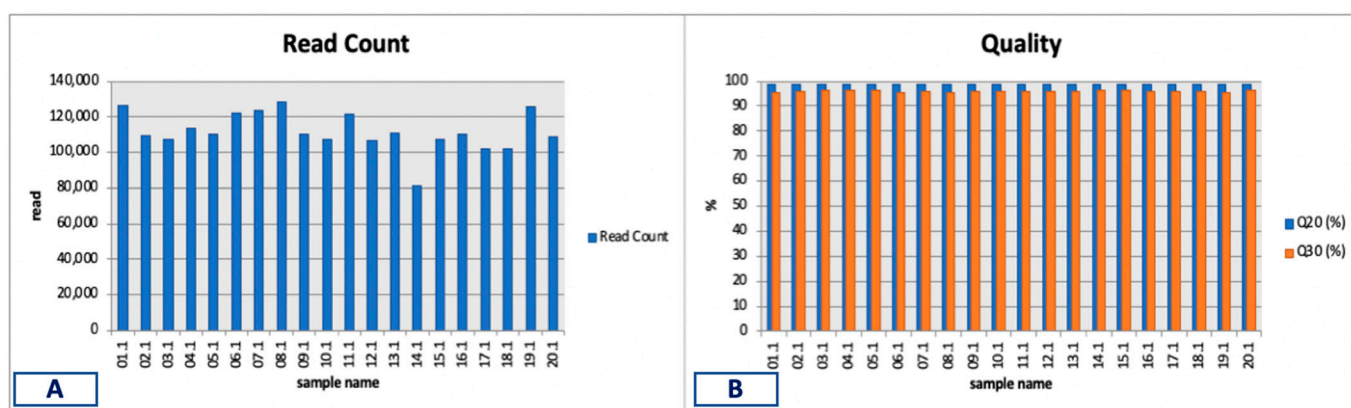

**Figure S6** Sample read counts (A) and sequence quality (B) from 16S primers.

The top five results for the bacteria comprised well over 80% of the total population/ community detected in most nails. *Staphylococcus epidermidis* DNA was found in every nail including the two controls. *Rothia koreensis* was also prominent as was *Brevibacterium sediminis* (Table S5).

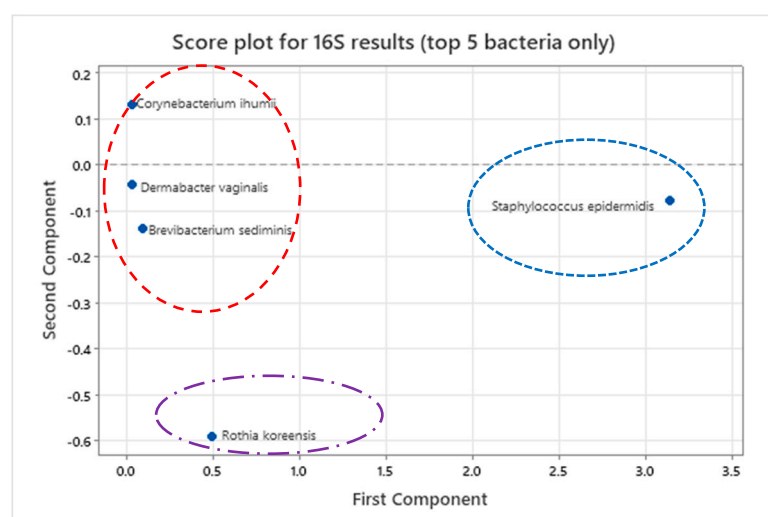

**Figure S7** Score plot from PCA, showing the separation of three clusters of nails characterised by the subdominant bacteria.
