# Supplementary material for: Metagenomics of Toenail Onychomycosis in Three Victorian Regions of Australia
Source: MDPI journal article supplement (doi:10.3390/jof8111198), 2022-11-14
Supplement: s1 [file s1]

## Supplementary Table S2. ITS2 rRNA Results

### Nail 1

| Nail 1. Species. ITS2              | % Hits |
|------------------------------------|--------|
| <i>Trichophyton rubrum</i>         | 98.11  |
| <i>Trichophyton mentagrophytes</i> | 0.65   |
| <i>Filobasidium</i> sp.            | 0.38   |
| <i>Cystobasidium</i> sp.           | 0.22   |
| Fungi                              | 0.14   |
| <i>Candida parapsilosis</i>        | 0.12   |
| <i>Naganishia diffluens</i>        | 0.07   |
| <i>Meyerozyma guilliermondii</i>   | 0.07   |
| <i>Aspergillus penicillioides</i>  | 0.07   |
| <i>Cladosporium herbarum</i>       | 0.05   |
| <i>Malassezia</i> sp.              | 0.04   |
| <i>Cryptococcus uniguttulatus</i>  | 0.03   |
| <i>Melissa officinalis</i>         | 0.03   |
| Total                              | 100.00 |

### Nail 2

| Nail 2. Species. ITS2              | % Hits |
|------------------------------------|--------|
| <i>Trichophyton rubrum</i>         | 95.53  |
| <i>Rhodotorula</i> sp.             | 0.88   |
| <i>Candida parapsilosis</i>        | 0.61   |
| <i>Aureobasidium pullulans</i>     | 0.50   |
| <i>Verrucaria</i> sp.              | 0.34   |
| Unidentified                       | 0.29   |
| <i>Malassezia</i> sp.              | 0.25   |
| <i>Cladosporium herbarum</i>       | 0.14   |
| <i>Epicoccum nigrum</i>            | 0.10   |
| Verrucariales                      | 0.08   |
| Fungi                              | 0.08   |
| <i>Coniosporium</i> sp.            | 0.07   |
| <i>Filobasidium</i> sp.            | 0.06   |
| <i>Exobasidium vexans</i>          | 0.06   |
| Trebouxiophyceae                   | 0.05   |
| <i>Cladosporium sphaerospermum</i> | 0.05   |

|                                     |      |
|-------------------------------------|------|
| Capnodiaceae                        | 0.05 |
| <i>Botrytis cinerea</i>             | 0.05 |
| <i>Meyerozyma guilliermondii</i>    | 0.04 |
| <i>Streptophyta</i> sp.             | 0.04 |
| Chaetothyriales                     | 0.04 |
| <i>Scopulariopsis candida</i>       | 0.04 |
| <i>Xenodidymella</i> sp.            | 0.03 |
| Cucurbitales                        | 0.03 |
| <i>Neophaeococcomyces</i> sp.       | 0.03 |
| <i>Rhodotorula babjevae</i>         | 0.03 |
| <i>Zalaria obscura</i>              | 0.03 |
| <i>Paraphoma</i> sp.                | 0.03 |
| <i>Naganishia diffluens</i>         | 0.03 |
| <i>Neocatenulostroma germanicum</i> | 0.03 |
| <i>Cystobasidium</i> sp.            | 0.03 |
| Pleosporales                        | 0.02 |
| <i>Lecanicillium fungicola</i>      | 0.02 |
| Herpotrichiellaceae                 | 0.02 |
| Ascomycota                          | 0.02 |
| <i>Phoma</i> sp.                    | 0.02 |
| <i>Curvularia coatesiae</i>         | 0.02 |
| <i>Flavoplaca oasis</i>             | 0.02 |
| <i>Bjerkandera</i> sp.              | 0.01 |
| Malasseziales                       | 0.01 |
| <i>Arachis</i> sp.                  | 0.01 |
| <i>Triticum aestivum</i>            | 0.01 |
| Capnodiales                         | 0.01 |
| <i>Yarrowia lipolytica</i>          | 0.01 |
| <i>Beta</i> sp.                     | 0.01 |
| Unassigned                          | 0.01 |
| <i>Sporothrix</i> sp.               | 0.01 |
| <i>Dianthus</i> sp.                 | 0.01 |
| <i>Thelebolus</i> sp.               | 0.01 |
| <i>Verrucaria muralis</i>           | 0.01 |
| Physciaceae                         | 0.01 |
| <i>Aspergillus versicolor</i>       | 0.01 |
| <i>Alternaria infectoria</i>        | 0.01 |
| <i>Ochroconis mirabilis</i>         | 0.01 |
| Dothideomycetes                     | 0.01 |
| <i>Seiridium cardinale</i>          | 0.01 |
| <i>Vishniacozyma victoriae</i>      | 0.01 |
| <i>Trifolium glomeratum</i>         | 0.01 |

|                                 |        |
|---------------------------------|--------|
| <i>Pseudotaeniolina globosa</i> | 0.01   |
| <i>Cladophialophora</i> sp.     | 0.01   |
| <i>Kunzea baxteri</i>           | 0.01   |
| Chlorophyta                     | 0.01   |
| Miscellaneous unidentified      | 0.03   |
| Total                           | 100.00 |

### Nail 3

| Nail 3. Species. ITS2              | % Hits |
|------------------------------------|--------|
| <i>Trichophyton rubrum</i>         | 99.93  |
| Fungi                              | 0.02   |
| <i>Hypholoma</i> sp.               | 0.02   |
| <i>Trichophyton mentagrophytes</i> | 0.02   |
| <i>Debaryomyces hansenii</i>       | 0.01   |
| Total                              | 100.00 |

### Nail 4

| Nail 4. Species. ITS2              | % Hits |
|------------------------------------|--------|
| <i>Trichophyton mentagrophytes</i> | 99.13  |
| <i>Epicoccum nigrum</i>            | 0.10   |
| <i>Cladosporium herbarum</i>       | 0.10   |
| <i>Exophiala eucalyptorum</i>      | 0.09   |
| <i>Malassezia</i> sp.              | 0.08   |
| <i>Filobasidium</i> sp.            | 0.08   |
| <i>Vishniacozyma victoriae</i>     | 0.06   |
| <i>Candida parapsilosis</i>        | 0.02   |
| Fungi                              | 0.02   |
| <i>Sporidiobolus metaroseus</i>    | 0.02   |
| Unassigned                         | 0.02   |
| <i>Holtermanniella</i> sp.         | 0.02   |
| <i>Rhodotorula babjevae</i>        | 0.01   |
| <i>Cladosporium sphaerospermum</i> | 0.01   |
| Malasseziales                      | 0.01   |
| <i>Rhodotorula</i> sp.             | 0.01   |
| <i>Pyrenochaetopsis</i> sp         | 0.01   |
| <i>Saccharomyces cerevisiae</i>    | 0.01   |
| <i>Hortaea thailandica</i>         | 0.01   |
| <i>Penicillium</i> sp.             | 0.01   |

|                                    |        |
|------------------------------------|--------|
| <i>Trichophyton rubrum</i>         | 0.01   |
| <i>Penicillium brevicompactum</i>  | 0.01   |
| <i>Agaricus bisporus</i>           | 0.01   |
| <i>Phaeosphaeria</i> sp.           | 0.01   |
| <i>Liberomyces pistaciae</i>       | 0.01   |
| <i>Dioszegia</i> sp.               | 0.01   |
| Verrucariales                      | 0.01   |
| Pleosporales                       | 0.01   |
| Fungi                              | 0.01   |
| <i>Dissoconium aciculare</i>       | 0.01   |
| Helotiales                         | 0.01   |
| <i>Microdochium seminicola</i>     | 0.01   |
| <i>Cystofilobasidium capitatum</i> | 0.01   |
| <i>Melissa officinalis</i>         | 0.01   |
| <i>Syzygium floribundum</i>        | 0.01   |
| <i>Lecanicillium</i> sp.           | 0.01   |
| Streptophyta                       | 0.01   |
| Miscellaneous unidentified         | 0.05   |
| Total                              | 100.00 |

## Nail 5

| <b>Nail 5. Species. ITS2</b>        | <b>% Hits</b> |
|-------------------------------------|---------------|
| <i>Aspergillus versicolor</i>       | 99.40         |
| <i>Cladosporium herbarum</i>        | 0.09          |
| Ascomycota                          | 0.05          |
| <i>Epicoccum nigrum</i>             | 0.03          |
| <i>Aureobasidium pullulans</i>      | 0.03          |
| <i>Alternaria alternata</i>         | 0.03          |
| <i>Solanum lycopersicum</i>         | 0.03          |
| <i>Coprinellus velatopruinatus</i>  | 0.03          |
| Eukaryota kgd Incertae sedis        | 0.03          |
| <i>Neophaeococcoomyces</i> sp.      | 0.01          |
| <i>Verrucaria ahtii</i>             | 0.01          |
| Unassigned                          | 0.01          |
| Dothideomycetes                     | 0.01          |
| Auriculariales                      | 0.01          |
| Dothideomycetes                     | 0.01          |
| <i>Vanderwaltozyma</i> sp.          | 0.01          |
| <i>Xylodon</i> sp.                  | 0.01          |
| <i>Gaertneriomyces semiglobifer</i> | 0.01          |

|                                      |        |
|--------------------------------------|--------|
| Verrucariaceae                       | 0.01   |
| <i>Neodevriesia</i> sp.              | 0.01   |
| <i>Erysiphe alphitoides</i>          | 0.01   |
| <i>Cyberlindnera</i> sp.             | 0.01   |
| <i>Saccharomyces cerevisiae</i>      | 0.01   |
| Fungi                                | 0.01   |
| <i>Toxicocladosporium rubrigenum</i> | 0.01   |
| Chaetothyriales                      | 0.01   |
| <i>Pichia fermentans</i>             | 0.01   |
| <i>Ganoderma</i> sp.                 | 0.01   |
| <i>Peniophora lycii</i>              | 0.01   |
| <i>Apiotrichum</i> sp.               | 0.01   |
| <i>Botrytis cinerea</i>              | 0.01   |
| <i>Kazachstania servazzii</i>        | 0.01   |
| Miscellaneous unidentified           | 0.10   |
| Total                                | 100.00 |

## Nail 6

| Nail 6. Species. ITS2              | % Hits |
|------------------------------------|--------|
| <i>Trichophyton mentagrophytes</i> | 70.39  |
| <i>Nigrospora oryzae</i>           | 6.18   |
| <i>Epicoccum nigrum</i>            | 6.11   |
| <i>Cladosporium herbarum</i>       | 4.81   |
| Ascomycota                         | 3.86   |
| <i>Rhodotorula</i> sp.             | 1.21   |
| <i>Cryptococcus uniguttulatus</i>  | 0.72   |
| <i>Alternaria alternata</i>        | 0.71   |
| <i>Aureobasidium pullulans</i>     | 0.59   |
| Pleosporales                       | 0.36   |
| <i>Yarrowia lipolytica</i>         | 0.31   |
| Fungi                              | 0.30   |
| <i>Vishniacozyma victoriae</i>     | 0.25   |
| <i>Eukaryota Incertae sedis</i>    | 0.23   |
| <i>Periconia</i> sp.               | 0.22   |
| <i>Cladosporium sphaerospermum</i> | 0.19   |
| <i>Curvularia coatesiae</i>        | 0.18   |
| Unassigned                         | 0.18   |
| <i>Tausonia pullulans</i>          | 0.16   |
| <i>Pyrenophora erythrospila</i>    | 0.16   |
| <i>Filobasidium</i> sp.            | 0.15   |

|                                        |      |
|----------------------------------------|------|
| <i>Phaeosphaeria</i>                   | 0.10 |
| <i>Oidium</i> sp.                      | 0.10 |
| <i>Candida parapsilosis</i>            | 0.09 |
| <i>Bipolaris</i> sp.                   | 0.09 |
| <i>Botrytis cinerea</i>                | 0.09 |
| Dothideomycetes                        | 0.08 |
| <i>Phaeosphaeria</i> sp.               | 0.07 |
| <i>Symmetrospora foliicola</i>         | 0.06 |
| <i>Saitozyma</i> sp.                   | 0.05 |
| <i>Dothidea</i> sp.                    | 0.05 |
| <i>Pyrenophora</i> sp.                 | 0.05 |
| <i>Meyerozyma guilliermondii</i>       | 0.05 |
| <i>Papiliotrema flavescens</i>         | 0.04 |
| <i>Naganishia diffluens</i>            | 0.04 |
| <i>Pichia fermentans</i>               | 0.04 |
| <i>Melaleuca bracteata</i>             | 0.04 |
| Streptophyta                           | 0.04 |
| <i>Bisifusarium dimerum</i>            | 0.04 |
| <i>Rhynchogastrema tunnelae</i>        | 0.04 |
| <i>Phaeothecoidea minutispora</i>      | 0.04 |
| <i>Candida</i> sp.                     | 0.04 |
| <i>Goffeauzyma agrionensis</i>         | 0.04 |
| <i>Saitozyma flava</i>                 | 0.04 |
| <i>Tetracladium marchalianum</i>       | 0.04 |
| Dothioraceae                           | 0.03 |
| <i>Pseudosydowia eucalypti</i>         | 0.03 |
| Verrucariaceae                         | 0.03 |
| <i>Curvibasidium pallidicorallinum</i> | 0.03 |
| <i>Fonsecazyma</i> sp.                 | 0.03 |
| Chaetothyriales                        | 0.03 |
| <i>Dothiorella sarmentorum</i>         | 0.03 |
| <i>Curvularia kusanoi</i>              | 0.03 |
| <i>Aspergillus fumigatus</i>           | 0.02 |
| Phaeosphaeriaceae                      | 0.02 |
| <i>Alternaria infectoria</i>           | 0.02 |
| <i>Erythrobasidium</i> sp.             | 0.02 |
| <i>Malassezia</i> sp.                  | 0.02 |
| <i>Pilidium concavum</i>               | 0.02 |
| Capnodiales                            | 0.02 |
| <i>Coniella</i> sp.                    | 0.02 |
| <i>Rhodotorula babjevae</i>            | 0.02 |
| <i>Talaromyces</i> sp.                 | 0.02 |

|                                   |      |
|-----------------------------------|------|
| <i>Xenodidymella</i> sp.          | 0.02 |
| <i>Cryptovalsa ampelina</i>       | 0.02 |
| <i>Vishniacozyma heimaeyensis</i> | 0.02 |
| <i>Penicillium</i> sp.            | 0.02 |
| Sporidiobolaceae                  | 0.02 |
| <i>Vishniacozyma dimennae</i>     | 0.02 |
| Chaetothyriales                   | 0.02 |
| <i>Geopyxis</i> sp.               | 0.02 |
| Tremellales                       | 0.02 |
| <i>Jasminum elongatum</i>         | 0.02 |
| <i>Keissleriella cladophila</i>   | 0.01 |
| <i>Malassezia slooffiae</i>       | 0.01 |
| <i>Paraconiothyrium</i> sp.       | 0.01 |
| Fungi                             | 0.01 |
| <i>Coniosporium</i> sp.           | 0.01 |
| <i>Cytospora austromontana</i>    | 0.01 |
| <i>Buckleyzyma aurantiaca</i>     | 0.01 |
| <i>Papiliotrema frias</i>         | 0.01 |
| <i>Stemphylium</i> sp.            | 0.01 |
| <i>Phaeotheca</i> sp.             | 0.01 |
| <i>Vanderwaltozyma</i> sp.        | 0.01 |
| <i>Alfaria putrefolia</i>         | 0.01 |
| <i>Septoria</i> sp.               | 0.01 |
| <i>Exophiala eucalyptorum</i>     | 0.01 |
| <i>Rosa banksiae</i>              | 0.01 |
| <i>Dothideomycetes</i> sp         | 0.01 |
| <i>Phomatospora dinemasporium</i> | 0.01 |
| <i>Eucalyptus botryoides</i>      | 0.01 |
| <i>Neophaeococcomyces</i> sp.     | 0.01 |
| <i>Phacidiella eucalypti</i>      | 0.01 |
| Ascomycota                        | 0.01 |
| <i>Buckleyzyma armeniaca</i>      | 0.01 |
| <i>Pseudorobillarda</i> sp.       | 0.01 |
| <i>Aspergillus</i> sp.            | 0.01 |
| <i>Colletotrichum</i> sp.         | 0.01 |
| <i>Clonostachys</i> sp.           | 0.01 |
| <i>Microdochium seminicola</i>    | 0.01 |
| <i>Cystobasidium</i> sp.          | 0.01 |
| <i>Ustilago</i> sp.               | 0.01 |
| Didymellaceae                     | 0.01 |
| <i>Kockovaella</i> sp.            | 0.01 |
| <i>Didymella</i> sp.              | 0.01 |

|                                          |        |
|------------------------------------------|--------|
| <i>Ramularia plurivora</i>               | 0.01   |
| <i>Aspergillus niger</i>                 | 0.01   |
| <i>Diplocarpon rosae</i>                 | 0.01   |
| Phaeosphaeriaceae                        | 0.01   |
| <i>Candida albicans</i>                  | 0.01   |
| Verrucariales                            | 0.01   |
| <i>Phacidium</i> sp.                     | 0.01   |
| <i>Pyrenochaetopsis</i> sp.              | 0.01   |
| <i>Cylindrodendrum</i> sp.               | 0.01   |
| <i>Paraphaeosphaeria michotii</i>        | 0.01   |
| <i>Pleurophoma</i> sp.                   | 0.01   |
| Thyridariaceae                           | 0.01   |
| Pleosporales                             | 0.01   |
| <i>Monocillium tenue</i>                 | 0.01   |
| <i>Cystobasidium lysinophilum</i>        | 0.01   |
| <i>Spencerozyma crocea</i>               | 0.01   |
| <i>Rhodosporeidiobolus colostri</i>      | 0.01   |
| <i>Naganishia</i> sp.                    | 0.01   |
| <i>Cryptococcus</i> sp.                  | 0.01   |
| <i>Fraxinus angustifolia</i>             | 0.01   |
| <i>Prunus</i> sp.                        | 0.01   |
| <i>Trametes</i> sp.                      | 0.01   |
| <i>Sympoventuria capensis</i>            | 0.01   |
| <i>Penicillium glabrum</i>               | 0.01   |
| Phaeomoniellales                         | 0.01   |
| <i>Debaryomyces hansenii</i>             | 0.01   |
| <i>Fusarium chlamydosporum</i>           | 0.01   |
| Sordariomycetes                          | 0.01   |
| Basidiomycota                            | 0.01   |
| <i>Vishniacozyma</i> sp.                 | 0.01   |
| <i>Lophiostoma corticola</i>             | 0.01   |
| <i>Tetraplospora</i> sp.                 | 0.01   |
| Venturiaceae                             | 0.01   |
| <i>Talaromyces ramulosus</i>             | 0.01   |
| <i>Diaporthe foeniculina</i>             | 0.01   |
| <i>Cytospora variostromatica</i>         | 0.01   |
| <i>Cystofilobasidium infirmominiatum</i> | 0.01   |
| <i>Dioszegia</i> sp.                     | 0.01   |
| Miscellaneous unidentified               | 0.13   |
| Total                                    | 100.00 |



## Nail 7

| Nail 7. Species. ITS2              | % Hits |
|------------------------------------|--------|
| <i>Trichophyton mentagrophytes</i> | 99.45  |
| <i>Fusarium chlamydosporum</i>     | 0.14   |
| <i>Candida parapsilosis</i>        | 0.06   |
| Malasseziales                      | 0.05   |
| <i>Malassezia</i> sp.              | 0.04   |
| <i>Farysia</i> sp.                 | 0.04   |
| <i>Coniosporium</i> sp.            | 0.04   |
| <i>Penicillium</i> sp.             | 0.04   |
| Fungi                              | 0.04   |
| <i>Cladosporium sphaerospermum</i> | 0.02   |
| <i>Alternaria alternata</i>        | 0.02   |
| <i>Moringa oleifera</i>            | 0.02   |
| <i>Trichophyton rubrum</i>         | 0.02   |
| <i>Exophiala dermatitidis</i>      | 0.01   |
| <i>Melissa officinalis</i>         | 0.01   |
| Total                              | 100.00 |

## Nail 8

| Nail 8. Species. ITS2              | % Hits |
|------------------------------------|--------|
| <i>Acremonium sclerotigenum</i>    | 86.27  |
| <i>Epicoccum nigrum</i>            | 3.34   |
| <i>Cladosporium herbarum</i>       | 1.75   |
| <i>Malassezia</i> sp.              | 1.39   |
| <i>Filobasidium</i> sp.            | 0.80   |
| <i>Rhodotorula</i> sp.             | 0.58   |
| <i>Bjerkandera</i> sp.             | 0.49   |
| <i>Cladosporium sphaerospermum</i> | 0.37   |
| Fungi                              | 0.32   |
| <i>Grammothele</i> sp.             | 0.31   |
| <i>Rhodotorula babjevae</i>        | 0.28   |
| Unassigned                         | 0.28   |
| <i>Vishniacozyma victoriae</i>     | 0.27   |
| Microbotryomycetes.                | 0.25   |
| <i>Aureobasidium pullulans</i>     | 0.23   |
| <i>Candida parapsilosis</i>        | 0.20   |
| <i>Curvularia lunata</i>           | 0.17   |

|                                     |        |
|-------------------------------------|--------|
| <i>Meyerozyma guilliermondii</i>    | 0.16   |
| <i>Penicillium corylophilum</i>     | 0.16   |
| <i>Cenchrus</i> sp.                 | 0.14   |
| <i>Aspergillus parasiticus</i>      | 0.13   |
| Cystobasidiomycetes                 | 0.12   |
| <i>Yarrowia lipolytica</i>          | 0.12   |
| <i>Scopulariopsis candida</i>       | 0.11   |
| <i>Cystobasidium</i> sp.            | 0.10   |
| Neodevriesiaceae                    | 0.10   |
| <i>Mycocalicium victoriae</i>       | 0.10   |
| <i>Exophiala</i> sp.                | 0.09   |
| <i>Malassezia slooffiae</i>         | 0.09   |
| Acarosporales                       | 0.09   |
| <i>Oxalis corniculata</i>           | 0.08   |
| <i>Moringa oleifera</i>             | 0.08   |
| <i>Naganishia diffluens</i>         | 0.07   |
| <i>Rutstroemia</i> sp.              | 0.07   |
| Eukaryota kgd Incertae sedis        | 0.07   |
| <i>Penicillium decumbens</i>        | 0.07   |
| <i>Malassezia sympodialis</i>       | 0.07   |
| <i>Trifolium glomeratum</i>         | 0.06   |
| <i>Exophiala mesophila</i>          | 0.06   |
| <i>Botrytis cinerea</i>             | 0.06   |
| <i>Peniophora lycii</i>             | 0.06   |
| <i>Eugenia biflora</i>              | 0.06   |
| <i>Cutaneotrichosporon mucoides</i> | 0.06   |
| Verrucariaceae                      | 0.05   |
| <i>Linum</i> sp.                    | 0.05   |
| <i>Phaeosphaeria</i> sp.            | 0.05   |
| <i>Phaeosphaeria</i> sp.            | 0.05   |
| <i>Pisum sativum</i>                | 0.04   |
| <i>Penicillium</i> sp.              | 0.03   |
| <i>Podosphaera erodii</i>           | 0.02   |
| Chaetothyriales                     | 0.01   |
| Orbiliales                          | 0.01   |
| Streptophyta                        | 0.01   |
| Total                               | 100.00 |

## Nail 9

| Nail 9. Species. ITS2 | Hits |
|-----------------------|------|
|-----------------------|------|

|                                     |       |
|-------------------------------------|-------|
| <i>Trichophyton mentagrophytes</i>  | 90.23 |
| Malasseziales                       | 1.34  |
| <i>Malassezia</i> sp.               | 1.22  |
| <i>Malassezia</i> sp.               | 0.68  |
| <i>Pseudocercospora fraxini</i>     | 0.56  |
| Fungi                               | 0.51  |
| <i>Cladosporium sphaerospermum</i>  | 0.50  |
| <i>Filobasidium</i> sp.             | 0.40  |
| <i>Aureobasidium pullulans</i>      | 0.36  |
| <i>Cladosporium herbarum</i>        | 0.33  |
| Incertae sedis unidentified         | 0.30  |
| <i>Acremonium</i> sp.               | 0.29  |
| <i>Epicoccum nigrum</i>             | 0.26  |
| <i>Pisum sativum</i>                | 0.23  |
| <i>Rhodotorula</i> sp.              | 0.21  |
| <i>Alternaria alternata</i>         | 0.19  |
| <i>Cutaneotrichosporon mucoides</i> | 0.14  |
| <i>Coniosporium</i> sp.             | 0.13  |
| Unassigned                          | 0.12  |
| <i>Meira</i> sp.                    | 0.11  |
| Fungi                               | 0.11  |
| <i>Rhizoplaca polymorpha</i>        | 0.10  |
| <i>Eugenia biflora</i>              | 0.10  |
| <i>Rhizoplaca subdiscrepans</i>     | 0.09  |
| <i>Naganishia diffluens</i>         | 0.09  |
| <i>Linum</i>                        | 0.08  |
| <i>Ramularia plurivora</i>          | 0.08  |
| <i>Musa</i> sp.                     | 0.07  |
| <i>Neophaeococcomyces</i> sp.       | 0.07  |
| <i>Lagerstroemia</i>                | 0.06  |
| <i>Verrucaria macrostoma</i>        | 0.05  |
| <i>Acremonium citrinum</i>          | 0.05  |
| Verrucariaceae                      | 0.05  |
| <i>Acremonium sclerotigenum</i>     | 0.05  |
| <i>Malassezia slooffiae</i>         | 0.05  |
| <i>Melissa officinalis</i>          | 0.04  |
| <i>Verrucaria nigrescens</i>        | 0.04  |
| <i>Gibberella acuminata</i>         | 0.04  |
| Ascomycota                          | 0.04  |
| <i>Triticum aestivum</i>            | 0.04  |
| <i>Moringa oleifera</i>             | 0.03  |
| Chlorophyta                         | 0.03  |

|                                    |        |
|------------------------------------|--------|
| <i>Sarcogyne regularis</i>         | 0.03   |
| <i>Vishniacozyma victoriae</i>     | 0.03   |
| <i>Dothideomycetes</i>             | 0.03   |
| <i>Fusarium chlamydosporum</i>     | 0.03   |
| Streptophyta                       | 0.03   |
| <i>Candida parapsilosis</i>        | 0.03   |
| <i>Cladosporium</i> sp.            | 0.03   |
| <i>Rhodotorula babjevae</i>        | 0.03   |
| <i>Pyrenochaeta unguis-hominis</i> | 0.02   |
| <i>Verrucaria muralis</i>          | 0.02   |
| <i>Leptospermum lanigerum</i>      | 0.02   |
| <i>Saccharomyces cerevisiae</i>    | 0.02   |
| <i>Corymbia citriodora</i>         | 0.02   |
| Phaeomoniellales                   | 0.02   |
| <i>Sarocladium</i> sp.             | 0.02   |
| <i>Phlebiporia bubalina</i>        | 0.02   |
| Acarosporales                      | 0.02   |
| Cucurbitales                       | 0.01   |
| <i>Trebouxia</i> sp.               | 0.01   |
| <i>Penicillium</i> sp.             | 0.01   |
| <i>Cystofilobasidium capitatum</i> | 0.01   |
| <i>Pycnoporus coccineus</i>        | 0.01   |
| <i>Debaryomyces hansenii</i>       | 0.01   |
| <i>Camellia semiserrata</i>        | 0.01   |
| <i>Penicillium steckii</i>         | 0.01   |
| <i>Platanus</i> sp.                | 0.01   |
| Miscellaneous unidentified         | 0.02   |
| Total                              | 100.00 |

## Nail 10

| Nail 10. Species. ITS2                                  | % Hits |
|---------------------------------------------------------|--------|
| Eukaryota kgd Incertae sedis/ <i>Fusarium oxysporum</i> | 86.27  |
| <i>Trichophyton mentagrophytes</i>                      | 12.81  |
| <i>Malassezia</i> sp.                                   | 0.49   |
| <i>Rhodotorula</i> sp.                                  | 0.08   |
| <i>Pseudocercospora fraxini</i>                         | 0.07   |
| <i>Cladosporium herbarum</i>                            | 0.07   |
| <i>Hyphoderma subsetigerum</i>                          | 0.04   |
| <i>Botryobasidium</i> sp.                               | 0.03   |
| <i>Xylodon</i> sp.                                      | 0.03   |

|                               |        |
|-------------------------------|--------|
| <i>Candida glabrata</i>       | 0.03   |
| <i>Candida parapsilosis</i>   | 0.02   |
| <i>Malassezia sympodialis</i> | 0.02   |
| <i>Melissa officinalis</i>    | 0.01   |
| <i>Trichophyton rubrum</i>    | 0.01   |
| Malasseziales                 | 0.01   |
| Miscellaneous unidentified    | 0.01   |
| Total                         | 100.00 |

## Nail 11

| Nail 11 (Control 1).Species. ITS2                       | % Hits |
|---------------------------------------------------------|--------|
| Eukaryota kgd Incertae sedis/ <i>Fusarium oxysporum</i> | 95.77  |
| <i>Epicoccum nigrum</i>                                 | 1.13   |
| <i>Aspergillus versicolor</i>                           | 0.90   |
| <i>Malassezia</i> sp.                                   | 0.43   |
| <i>Periconia macrospinoso</i>                           | 0.39   |
| <i>Cladosporium herbarum</i>                            | 0.30   |
| Ascomycota                                              | 0.18   |
| <i>Candida parapsilosis</i>                             | 0.16   |
| <i>Melissa officinalis</i>                              | 0.10   |
| <i>Trichophyton rubrum</i>                              | 0.08   |
| <i>Candida albicans</i>                                 | 0.07   |
| Capnodiales                                             | 0.06   |
| <i>Trichophyton mentagrophytes</i>                      | 0.06   |
| <i>Pyrenophora</i> sp.                                  | 0.04   |
| <i>Alternaria infectoria</i>                            | 0.04   |
| <i>Naganishia diffluens</i>                             | 0.04   |
| Unassigned                                              | 0.03   |
| <i>Malassezia sympodialis</i>                           | 0.03   |
| <i>Sistotrema</i> sp.                                   | 0.02   |
| <i>Ochroconis mirabilis</i>                             | 0.02   |
| Fungi                                                   | 0.02   |
| <i>Botrytis cinerea</i>                                 | 0.02   |
| Ascomycota                                              | 0.02   |
| <i>Cystobasidium laryngis</i>                           | 0.02   |
| <i>Acer saccharinum</i>                                 | 0.02   |
| <i>Penicillium dierckxii</i>                            | 0.02   |
| <i>Pichia fermentans</i>                                | 0.01   |
| <i>Penicillium brevicompactum</i>                       | 0.01   |
| Miscellaneous unidentified                              | 0.01   |

|       |        |
|-------|--------|
| Total | 100.00 |
|-------|--------|

## Nail 12

| Nail 12. Species. ITS2             | Hits  |
|------------------------------------|-------|
| <i>Trichophyton mentagrophytes</i> | 94.73 |
| <i>Filobasidium</i> sp.            | 1.39  |
| <i>Malassezia</i> sp.              | 0.65  |
| <i>Alternaria alternata</i>        | 0.57  |
| <i>Cladosporium herbarum</i>       | 0.49  |
| <i>Naganishia diffluens</i>        | 0.38  |
| <i>Malassezia slooffiae</i>        | 0.30  |
| <i>Vishniacozyma victoriae</i>     | 0.27  |
| <i>Rhodotorula</i> sp.             | 0.18  |
| <i>Papiliotrema frias</i>          | 0.17  |
| <i>Epicoccum nigrum</i>            | 0.12  |
| <i>Melissa officinalis</i>         | 0.10  |
| <i>Saccharomyces cerevisiae</i>    | 0.08  |
| <i>Botrytis cinerea</i>            | 0.06  |
| <i>Pichia</i> sp.                  | 0.05  |
| <i>Sigarispora</i> sp.             | 0.05  |
| <i>Debaryomyces hansenii</i>       | 0.04  |
| <i>Penicillium</i> sp.             | 0.04  |
| <i>Vishniacozyma dimennae</i>      | 0.04  |
| <i>Tausonia pullulans</i>          | 0.03  |
| <i>Pseudozyma</i> sp.              | 0.02  |
| <i>Meyerozyma guilliermondii</i>   | 0.02  |
| <i>Candida parapsilosis</i>        | 0.02  |
| <i>Trichophyton rubrum</i>         | 0.02  |
| Fungi                              | 0.02  |
| <i>Pichia membranifaciens</i>      | 0.02  |
| Capnodiales                        | 0.02  |
| <i>Pseudotaeniolina globosa</i>    | 0.01  |
| Malasseziales                      | 0.01  |
| Streptophyta                       | 0.01  |
| Basidiomycota                      | 0.01  |
| <i>Rhizopus arrhizus</i>           | 0.01  |
| <i>Lophostemon confertus</i>       | 0.01  |
| Fungi                              | 0.01  |
| Helotiales                         | 0.01  |
| <i>Cladosporium sphaerospermum</i> | 0.01  |

|                             |        |
|-----------------------------|--------|
| <i>Trebouxia</i> sp.        | 0.01   |
| <i>Zymoseptoria tritici</i> | 0.01   |
| Microbotryomycetes          | 0.01   |
| Unidentified                | 0.01   |
| Total                       | 100.00 |

## Nail 13

| Nail 13. Species. ITS2               | % Hits |
|--------------------------------------|--------|
| <i>Trichophyton rubrum</i>           | 94.82  |
| Streptophyta                         | 2.21   |
| <i>Cladosporium herbarum</i>         | 0.88   |
| <i>Alternaria</i> sp.                | 0.32   |
| <i>Malassezia</i> sp.                | 0.21   |
| <i>Holtermanniella</i> sp.           | 0.17   |
| <i>Melaleuca bracteata</i>           | 0.16   |
| <i>Candida parapsilosis</i>          | 0.13   |
| <i>Epicoccum nigrum</i>              | 0.09   |
| <i>Coniella</i> sp.                  | 0.08   |
| <i>Saccharomyces cerevisiae</i>      | 0.06   |
| <i>Melissa officinalis</i>           | 0.06   |
| <i>Lectera colletotrichoides</i>     | 0.05   |
| Sporormiaceae                        | 0.05   |
| Fungi                                | 0.05   |
| Unassigned                           | 0.04   |
| <i>Alternaria infectoria</i>         | 0.04   |
| <i>Alternaria alternata</i>          | 0.04   |
| <i>Fusarium chlamydosporum</i>       | 0.04   |
| <i>Fusicolla acetilerea</i>          | 0.04   |
| <i>Dimorphiseta acuta</i>            | 0.04   |
| <i>Alfaria putrefolia</i>            | 0.03   |
| <i>Coniosporium</i> sp.              | 0.03   |
| <i>Pseudocercospora fraxini</i>      | 0.03   |
| <i>Rhodosporidiobolus colostri</i>   | 0.03   |
| <i>Aspergillus</i> sp.               | 0.02   |
| <i>Penicillium</i> sp.               | 0.02   |
| <i>Toxicocladosporium rubrigenum</i> | 0.02   |
| <i>Microbotryum</i> sp.              | 0.02   |
| <i>Melaleuca linariifolia</i>        | 0.02   |
| <i>Lactuca sativa</i>                | 0.02   |
| Teratosphaeriaceae                   | 0.02   |

|                             |        |
|-----------------------------|--------|
| <i>Gymnoascus</i> sp.       | 0.01   |
| <i>Allium</i> sp.           | 0.01   |
| <i>Triticum aestivum</i>    | 0.01   |
| <i>Lolium</i> sp.           | 0.01   |
| <i>Aspergillus sparsus</i>  | 0.01   |
| <i>Malva parviflora</i>     | 0.01   |
| <i>Arctotheca</i> sp.       | 0.01   |
| <i>Salvia</i> sp.           | 0.01   |
| Dothideales                 | 0.01   |
| <i>Solanum lycopersicum</i> | 0.01   |
| <i>Prunus</i> sp.           | 0.01   |
| Miscellaneous unidentified  | 0.02   |
| Total                       | 100.00 |

## Nail 14

| Nail 14. Species. ITS2             | % Hits |
|------------------------------------|--------|
| <i>Trichophyton rubrum</i>         | 98.62  |
| <i>Cladosporium herbarum</i>       | 0.43   |
| <i>Alternaria</i> sp.              | 0.19   |
| <i>Epicoccum nigrum</i>            | 0.16   |
| <i>Alternaria alternata</i>        | 0.12   |
| Ascomycota                         | 0.07   |
| <i>Rhodotorula</i> sp.             | 0.05   |
| Fungi                              | 0.04   |
| <i>Candida parapsilosis</i>        | 0.03   |
| <i>Sporidiobolus metaroseus</i>    | 0.03   |
| <i>Golovinomyces orontii</i>       | 0.02   |
| <i>Neosascochyta cylindrispora</i> | 0.02   |
| Pleosporales                       | 0.02   |
| <i>Ochroconis mirabilis</i>        | 0.02   |
| <i>Podosphaera erodii</i>          | 0.02   |
| <i>Rhodotorula babjevae</i>        | 0.02   |
| Unassigned                         | 0.01   |
| <i>Pseudocercospora fraxini</i>    | 0.01   |
| <i>Coprinellus micaceus</i>        | 0.01   |
| <i>Pseudozyma</i> sp.              | 0.01   |
| Hymenochaetales                    | 0.01   |
| <i>Penicillium</i> sp.             | 0.01   |
| <i>Helotiales</i> sp.              | 0.01   |
| <i>Melissa officinalis</i>         | 0.01   |



|                                |        |
|--------------------------------|--------|
| <i>Symmetrospora foliicola</i> | 0.01   |
| Dothideomycetes                | 0.01   |
| Eukaryota Incertae sedis       | 0.01   |
| Miscellaneous unidentified     | 0.03   |
| Total                          | 100.00 |

## Nail 15

| Nail 15. Species. ITS2            | % Hits |
|-----------------------------------|--------|
| <i>Trichophyton rubrum</i>        | 97.77  |
| <i>Cladosporium herbarum</i>      | 0.72   |
| <i>Aureobasidium pullulans</i>    | 0.22   |
| <i>Agaricus bisporus</i>          | 0.20   |
| <i>Epicoccum nigrum</i>           | 0.17   |
| Fungi                             | 0.07   |
| <i>Alternaria alternata</i>       | 0.06   |
| <i>Malassezia</i> sp.             | 0.05   |
| Pleosporales                      | 0.05   |
| <i>Naganishia diffluens</i>       | 0.05   |
| <i>Alternaria</i> sp.             | 0.04   |
| Ascomycota                        | 0.04   |
| <i>Candida parapsilosis</i>       | 0.04   |
| <i>Vishniacozyma victoriae</i>    | 0.04   |
| <i>Ustilago</i> sp.               | 0.04   |
| <i>Phialemonium inflatum</i>      | 0.03   |
| <i>Cystobasidium</i> sp.          | 0.03   |
| <i>Rhodotorula babjevae</i>       | 0.03   |
| <i>Botrytis cinerea</i>           | 0.03   |
| Eukaryota Incertae sedis          | 0.03   |
| <i>Alternaria infectoria</i>      | 0.03   |
| <i>Filobasidium</i> sp.           | 0.02   |
| <i>Fusarium chlamydosporum</i>    | 0.02   |
| <i>Holtermanniella</i> sp.        | 0.02   |
| <i>Neoascochyta cylindrispora</i> | 0.02   |
| Unassigned                        | 0.02   |
| Ceratobasidiaceae                 | 0.02   |
| <i>Scedosporium aurantiacum</i>   | 0.01   |
| <i>Vishniacozyma dimennae</i>     | 0.01   |
| Verrucariales                     | 0.01   |
| Streptophyta                      | 0.01   |
| Pleosporales                      | 0.01   |

|                                    |        |
|------------------------------------|--------|
| <i>Symmetrospora foliicola</i>     | 0.01   |
| <i>Xanthocarpia</i> sp.            | 0.01   |
| <i>Cladosporium sphaerospermum</i> | 0.01   |
| <i>Moringa oleifera</i>            | 0.01   |
| <i>Rosa</i> sp.                    | 0.01   |
| <i>Amyema</i> sp.                  | 0.01   |
| <i>Papillotrema frias</i>          | 0.01   |
| Miscellaneous unidentified         | 0.04   |
| Total                              | 100.00 |

## Nail 16

| Nail 16. Species. ITS2             | % Hits |
|------------------------------------|--------|
| <i>Trichophyton mentagrophytes</i> | 90.43  |
| <i>Trifolium glomeratum</i>        | 2.40   |
| <i>Aureobasidium pullulans</i>     | 1.46   |
| <i>Epicoccum nigrum</i>            | 0.91   |
| <i>Tremella</i> sp.                | 0.73   |
| Fungi                              | 0.62   |
| <i>Cladosporium herbarum</i>       | 0.61   |
| <i>Meyerozyma guilliermondii</i>   | 0.49   |
| <i>Malassezia</i> sp.              | 0.37   |
| <i>Rhodotorula</i> sp.             | 0.28   |
| <i>Exophiala eucalyptorum</i>      | 0.23   |
| <i>Penicillium</i> sp.             | 0.16   |
| <i>Penicillium brevicompactum</i>  | 0.15   |
| <i>Candida parapsilosis</i>        | 0.10   |
| <i>Erythrobasidium</i> sp.         | 0.10   |
| <i>Alternaria alternata</i>        | 0.07   |
| <i>Ustilago cynodontis</i>         | 0.07   |
| Unassigned                         | 0.06   |
| <i>Pseudocercospora fraxini</i>    | 0.06   |
| Eukaryota Incertae sedis           | 0.06   |
| Agaricomycetes                     | 0.06   |
| <i>Filobasidium</i> sp.            | 0.05   |
| <i>Parafenestella rosacearum</i>   | 0.05   |
| Periconiaceae                      | 0.05   |
| <i>Penicillium glabrum</i>         | 0.05   |
| <i>Rhodotorula babjevae</i>        | 0.04   |
| Pleosporales                       | 0.04   |
| Helotiales                         | 0.04   |

|                                |        |
|--------------------------------|--------|
| <i>Naganishia</i> sp.          | 0.04   |
| Streptophyta                   | 0.03   |
| <i>Brachysporium nigrum</i>    | 0.03   |
| Ascomycota                     | 0.03   |
| <i>Papiliotrema frias</i>      | 0.03   |
| <i>Debaryomyces hansenii</i>   | 0.02   |
| <i>Hormonema</i> sp.           | 0.02   |
| <i>Pseudozyma</i> sp.          | 0.02   |
| <i>Conocybe fuscimarginata</i> | 0.02   |
| Dothideomycetes                | 0.01   |
| Onygenales Incertae sedis      | 0.01   |
| <i>Wardomyopsis humicola</i>   | 0.01   |
| <i>19artalini</i> asp.         | 0.01   |
| <i>Argyranthemum</i> sp.       | 0.01   |
| <i>Vishniacozyma victoriae</i> | 0.01   |
| <i>Papaver</i> sp.             | 0.01   |
| Miscellaneous unidentified     | 0.01   |
| Total                          | 100.00 |

## Nail 17

| Nail 17. Fungi. ITS2               | % Hits |
|------------------------------------|--------|
| <i>Trichophyton mentagrophytes</i> | 97.63  |
| <i>Cladosporium herbarum</i>       | 0.85   |
| <i>Candida parapsilosis</i>        | 0.35   |
| <i>Alternaria alternata</i>        | 0.33   |
| <i>Ustilago cynodontis</i>         | 0.29   |
| <i>Malassezia</i> sp.              | 0.13   |
| <i>Fusarium chlamydosporum</i>     | 0.06   |
| <i>Epicoccum nigrum</i>            | 0.05   |
| Dothideomycetes                    | 0.05   |
| <i>Pseudocercospora fraxini</i>    | 0.04   |
| Fungi                              | 0.03   |
| Eukaryota Incertae sedis           | 0.03   |
| <i>Cylindrium</i> sp.              | 0.03   |
| <i>Capnodiales</i> sp.             | 0.03   |
| <i>Melissa officinalis</i>         | 0.02   |
| <i>Alternaria infectoria</i>       | 0.02   |
| <i>Saccharomyces cerevisiae</i>    | 0.02   |
| Ascomycota                         | 0.02   |

|                              |        |
|------------------------------|--------|
| <i>Eucalyptus botryoides</i> | 0.01   |
| <i>Aspergillus ochraceus</i> | 0.01   |
| Total                        | 100.00 |

## Nail 18

| Nail 18. Species. ITS2          | % Hits |
|---------------------------------|--------|
| <i>Trichophyton rubrum</i>      | 83.80  |
| <i>Cladosporium herbarum</i>    | 2.86   |
| <i>Malassezia</i> sp.           | 2.19   |
| <i>Epicoccum nigrum</i>         | 1.49   |
| <i>Alternaria alternata</i>     | 0.92   |
| <i>Filobasidium</i> sp.         | 0.73   |
| <i>Alternaria</i> sp.           | 0.56   |
| Malasseziales                   | 0.47   |
| <i>Rhodotorula</i> sp.          | 0.44   |
| Fungi                           | 0.39   |
| <i>Stemphylium</i> sp.          | 0.36   |
| <i>Stachybotrys chartarum</i>   | 0.34   |
| Ascomycota                      | 0.33   |
| <i>Penicillium</i> sp.          | 0.33   |
| <i>Aureobasidium pullulans</i>  | 0.32   |
| Pleosporales                    | 0.25   |
| <i>Trebouxia</i> sp.            | 0.24   |
| <i>Alternaria infectoria</i>    | 0.22   |
| <i>Debaryomyces hansenii</i>    | 0.21   |
| Eukaryota Incertae sedis        | 0.19   |
| <i>Fusarium chlamydosporum</i>  | 0.18   |
| <i>Naganishia diffluens</i>     | 0.16   |
| <i>Candida parapsilosis</i>     | 0.13   |
| <i>Rhizophlyctis</i> sp.        | 0.12   |
| <i>Solanum lycopersicum</i>     | 0.12   |
| <i>Malassezia globosa</i>       | 0.12   |
| <i>Arctotheca</i> sp.           | 0.09   |
| <i>Gibberella acuminata</i>     | 0.09   |
| <i>Mucor racemosus</i>          | 0.09   |
| <i>Botrytis cinerea</i>         | 0.09   |
| <i>Erodium</i> sp.              | 0.08   |
| <i>Pseudocercospora fraxini</i> | 0.08   |
| <i>Coniosporium</i> sp          | 0.08   |
| <i>Rhodotorula babjevae</i>     | 0.07   |

|                                             |      |
|---------------------------------------------|------|
| <i>Cryptococcus uniguttulatus</i>           | 0.07 |
| <i>Saccharomyces cerevisiae</i>             | 0.07 |
| <i>Tausonia pullulans</i>                   | 0.07 |
| <i>Cladosporium sphaerospermum</i>          | 0.07 |
| Dothideomycetes                             | 0    |
| <i>Exophiala xenobiotica</i>                | 0.06 |
| <i>Brassica rapa</i> subsp. <i>oleifera</i> | 0.06 |
| <i>Pleosporales</i>                         | 0.06 |
| <i>Eucalyptus botryoides</i>                | 0.05 |
| <i>Holtermanniella</i> sp..                 | 0.05 |
| <i>Eucalyptus botryoides</i>                | 0.05 |
| <i>Malassezia sympodialis</i>               | 0.05 |
| <i>Holtermanniella</i> sp.                  | 0.05 |
| <i>Exophiala eucalyptorum</i>               | 0.04 |
| <i>Vishniacozyma</i> sp.                    | 0.04 |
| <i>Meyerozyma guilliermondii</i>            | 0.04 |
| <i>Botryotrichum murorum</i>                | 0.04 |
| Unassigned                                  | 0.04 |
| <i>Leratiomyces ceres</i>                   | 0.04 |
| <i>Leucosporidium</i> sp.                   | 0.04 |
| <i>Yarrowia lipolytica</i>                  | 0.04 |
| Chaetothyriales                             | 0.03 |
| <i>Phialemonium inflatum</i>                | 0.03 |
| <i>Metarhizium marquandii</i>               | 0.03 |
| <i>Papiliotrema frias</i>                   | 0.03 |
| <i>Callistemon viminalis</i>                | 0.03 |
| Anthophyta                                  | 0.03 |
| <i>Vishniacozyma victoriae</i>              | 0.02 |
| <i>Herpotrichiellaceae</i>                  | 0.02 |
| <i>Acer negundo</i>                         | 0.02 |
| <i>Basidiobolus ranarum</i>                 | 0.02 |
| <i>Fraxinus angustifolia</i>                | 0.02 |
| Ceratobasidiaceae                           | 0.02 |
| <i>Podosphaera erodii</i>                   | 0.02 |
| <i>Arthrobotrys</i>                         | 0.02 |
| Leotiomycetes                               | 0.02 |
| <i>Pseudozyma</i> sp.                       | 0.02 |
| <i>Trichoderma</i> sp.                      | 0.02 |
| <i>Dimorphiseta acuta</i>                   | 0.02 |
| <i>Cryptococcus laurentii</i>               | 0.01 |
| <i>Trichosporon aquatile</i>                | 0.01 |
| <i>Issatchenkia orientalis</i>              | 0.01 |

|                                             |        |
|---------------------------------------------|--------|
| <i>Udeniomyces puniceus</i>                 | 0.01   |
| <i>Penicillium brevicompactum</i>           | 0.01   |
| <i>Cytospora</i> sp.                        | 0.01   |
| <i>Lectera colletotrichoides</i>            | 0.01   |
| <i>Olea europaea</i> subsp. <i>europaea</i> | 0.01   |
| <i>Phaeococcomyces</i> sp.                  | 0.01   |
| <i>Coelastrella</i> sp.                     | 0.01   |
| <i>Phaeosphaeria</i> sp.                    | 0.01   |
| <i>Lolium</i> sp.                           | 0.01   |
| <i>Cystobasidium</i> sp.                    | 0.01   |
| <i>Melaleuca bracteata</i>                  | 0.01   |
| Chaetothyriales                             | 0.01   |
| <i>Lycoperdon rupicola</i>                  | 0.01   |
| <i>Mortierella</i> sp.                      | 0.01   |
| <i>Hymenochaete</i> sp.                     | 0.01   |
| <i>Aspergillus versicolor</i>               | 0.01   |
| <i>Persicaria capitata</i>                  | 0.01   |
| <i>Malva parviflora</i>                     | 0.01   |
| <i>Platanus</i> sp.                         | 0.01   |
| <i>Pyrus salicifolia</i>                    | 0.01   |
| <i>Triticum aestivum</i>                    | 0.01   |
| <i>Helianthus</i> sp.                       | 0.01   |
| <i>Hanseniaspora uvarum</i>                 | 0.01   |
| <i>Cucumis</i> sp.                          | 0.01   |
| <i>Callistemon salignus</i>                 | 0.01   |
| Miscellaneous unidentified                  | 0.04   |
| Total                                       | 100.00 |

## Nail 19

| Nail 19. Species. ITS2             | % Hits |
|------------------------------------|--------|
| <i>Fusicolla acetilerea</i>        | 51.92  |
| <i>Trichophyton mentagrophytes</i> | 47.55  |
| <i>Epicoccum nigrum</i>            | 0.18   |
| <i>Alternaria alternata</i>        | 0.15   |
| <i>Cladosporium herbarum</i>       | 0.11   |
| <i>Cytospora eucalypticola</i>     | 0.02   |
| <i>Candida parapsilosis</i>        | 0.02   |
| <i>Cladosporium sphaerospermum</i> | 0.01   |
| <i>Filobasidium</i> sp.            | 0.01   |
| <i>Fusarium chlamydosporum</i>     | 0.01   |

|                            |        |
|----------------------------|--------|
| <i>Alternaria</i> sp.      | 0.01   |
| Fungi                      | 0.01   |
| Miscellaneous unidentified | 0.01   |
| Total                      | 100.00 |

## Nail 20

| Nail 20. (Control 2). Species. ITS2  | % Hits |
|--------------------------------------|--------|
| <i>Malassezia slooffiae</i>          | 93.57  |
| <i>Trichophyton mentagrophytes</i>   | 3.89   |
| <i>Cladosporium herbarum</i>         | 0.97   |
| <i>Epicoccum nigrum</i>              | 0.20   |
| Ascomycota                           | 0.14   |
| Fungi                                | 0.13   |
| <i>Alternaria alternata</i>          | 0.11   |
| Pleosporales                         | 0.09   |
| <i>Alternaria</i> sp.                | 0.07   |
| <i>Malassezia</i> sp.                | 0.07   |
| <i>Aureobasidium pullulans</i>       | 0.06   |
| Eukaryota kgd Incertae sedis         | 0.05   |
| <i>Phaeosphaeria</i> sp.             | 0.05   |
| <i>Phaeosphaeria</i> sp.             | 0.05   |
| <i>Rhodotorula</i> sp.               | 0.05   |
| <i>Phaeosphaeriaceae</i> sp.         | 0.03   |
| <i>Naganishia diffluens</i>          | 0.03   |
| <i>Periconia</i> sp.                 | 0.03   |
| <i>Paraphaeosphaeria michotii</i>    | 0.03   |
| <i>Plantago coronopus</i>            | 0.02   |
| <i>Candida parapsilosis</i>          | 0.02   |
| Unassigned                           | 0.02   |
| <i>Xylodon</i> sp.                   | 0.02   |
| <i>Toxicocladosporium rubrigenum</i> | 0.02   |
| <i>Albifimbria verrucaria</i>        | 0.01   |
| <i>Nigrospora</i> sp.                | 0.01   |
| <i>Vishniacozyma victoriae</i>       | 0.01   |
| <i>Bartalinia</i> sp.                | 0.01   |
| Dothideomycetes                      | 0.01   |
| <i>Penicillium</i> sp.               | 0.01   |
| <i>Truncatella restionacearum</i>    | 0.01   |
| <i>Fuscoporia contigua</i>           | 0.01   |
| <i>Fibroporia vaillantii</i>         | 0.01   |

|                                           |        |
|-------------------------------------------|--------|
| <i>Sistotremastrum</i> sp.                | 0.01   |
| <i>Pseudocercospora</i> <i>fraxini</i>    | 0.01   |
| Hymenochaetales                           | 0.01   |
| Fungi                                     | 0.01   |
| <i>Naganishia</i> sp.                     | 0.01   |
| <i>Petrophila</i> sp.                     | 0.01   |
| <i>Fusarium</i> <i>chlamydosporum</i>     | 0.01   |
| <i>Rhizoctonia</i> sp.                    | 0.01   |
| <i>Fomitopsis</i> <i>lilacinogilva</i>    | 0.01   |
| <i>Phlebiporia</i> <i>bubalina</i>        | 0.01   |
| <i>Cladosporium</i> <i>sphaerospermum</i> | 0.01   |
| <i>Stemphylium</i> sp.                    | 0.01   |
| <i>Hermatomyces</i> sp.                   | 0.01   |
| <i>Aspergillus</i> <i>versicolor</i>      | 0.01   |
| <i>Perenniporia</i> <i>maackiae</i>       | 0.01   |
| Dothideomycetes                           | 0.01   |
| <i>Sakaguchia</i> <i>dacryoidea</i>       | 0.01   |
| <i>Leucosporidium</i> sp                  | 0.01   |
| <i>Cryptococcus</i> <i>uniguttulatus</i>  | 0.01   |
| Miscellaneous unidentified                | 0.04   |
| Total                                     | 100.00 |
