# Supplementary material for: Metagenomics of Toenail Onychomycosis in Three Victorian Regions of Australia
Source: MDPI journal article supplement (doi:10.3390/jof8111198), 2022-11-14
Supplement: s1 [file s1]

# Supplementary Table S3 16S rRNA results

## Nail 1

| Nail 1. 16S                               | Hits % |
|-------------------------------------------|--------|
| <i>Staphylococcus epidermidis</i>         | 36.96  |
| <i>Rothia koreensis</i>                   | 19.83  |
| <i>Dermabacter vaginalis</i>              | 13.39  |
| <i>Brevibacterium sediminis</i>           | 11.86  |
| <i>Corynebacterium glyciniphilum</i>      | 8.97   |
| <i>Brevibacterium paucivorans</i>         | 6.62   |
| <i>Dietzia timorensis</i>                 | 0.90   |
| <i>Corynebacterium resistens</i>          | 0.84   |
| <i>Corynebacterium tuberculostearicum</i> | 0.30   |
| <i>Propioniferax innocua</i>              | 0.16   |
| <i>Brachybacterium faecium</i>            | 0.05   |
| <i>Escherichia fergusonii</i>             | 0.03   |
| <i>Clavibacter michiganensis</i>          | 0.03   |
| <i>Corynebacterium jeikeium</i>           | 0.01   |
| <i>Kocuria uropygioeca</i>                | 0.01   |
| <i>Corynebacterium massiliense</i>        | 0.01   |
| Miscellaneous unidentified                | 0.03   |
| Total                                     | 100.00 |

## Nail 2

| Nail 2                                    | Hits  |
|-------------------------------------------|-------|
| <i>Staphylococcus epidermidis</i>         | 61.79 |
| <i>Rothia koreensis</i>                   | 21.47 |
| <i>Brevibacterium sediminis</i>           | 16.12 |
| <i>Enterococcus hirae</i>                 | 0.21  |
| <i>Corynebacterium tuberculostearicum</i> | 0.13  |
| <i>Dermabacter vaginalis</i>              | 0.10  |
| <i>Dietzia timorensis</i>                 | 0.04  |
| <i>Kocuria uropygioeca</i>                | 0.04  |
| <i>Staphylococcus argensis</i>            | 0.03  |
| <i>Ignavigranum ruoffiae</i>              | 0.02  |
| <i>Corynebacterium amycolatum</i>         | 0.01  |
| <i>Staphylococcus simulans</i>            | 0.01  |
| <i>Corynebacterium massiliense</i>        | 0.01  |
| <i>Mucilaginibacter gotjawali</i>         | 0.01  |
| <i>Moraxella osloensis</i>                | 0.01  |

|                                   |        |
|-----------------------------------|--------|
| <i>Brachybacterium faecium</i>    | 0.01   |
| <i>Staphylococcus lugdunensis</i> | 0.01   |
| Miscellaneous unidentified        | 0.01   |
| Total                             | 100.00 |

### Nail 3

| Nail 3 16S                                | Hits % |
|-------------------------------------------|--------|
| <i>Staphylococcus epidermidis</i>         | 99.80  |
| <i>Cutibacterium acnes</i>                | 0.07   |
| <i>Corynebacterium tuberculostearicum</i> | 0.04   |
| <i>Brevibacterium sediminis</i>           | 0.02   |
| <i>Corynebacterium falsenii</i>           | 0.01   |
| <i>Corynebacterium ihumii</i>             | 0.01   |
| <i>Corynebacterium massiliense</i>        | 0.01   |
| <i>Brevibacterium paucivorans</i>         | 0.01   |
| Miscellaneous unidentified                | 0.03   |
| Total                                     | 100.00 |

### Nail 4

| Nail 4 16S                                | Hits % |
|-------------------------------------------|--------|
| <i>Staphylococcus epidermidis</i>         | 67.99  |
| <i>Rothia koreensis</i>                   | 24.32  |
| <i>Brevibacterium sediminis</i>           | 7.18   |
| <i>Corynebacterium tuberculostearicum</i> | 0.17   |
| <i>Dietzia timorensis</i>                 | 0.11   |
| <i>Micrococcus luteus</i>                 | 0.07   |
| <i>Brevundimonas albigilva</i>            | 0.04   |
| <i>Moraxella osloensis</i>                | 0.03   |
| <i>Kocuria uropygioeca</i>                | 0.02   |
| <i>Corynebacterium ihumii</i>             | 0.01   |
| <i>Staphylococcus argensis</i>            | 0.01   |
| <i>Corynebacterium bovis</i>              | 0.01   |
| <i>Staphylococcus lugdunensis</i>         | 0.01   |
| <i>Acinetobacter tjernbergiae</i>         | 0.01   |
| Miscellaneous unidentified                | 0.02   |
| Total                                     | 100.00 |

### Nail 5

| Nail 5 16S                        | Hits % |
|-----------------------------------|--------|
| <i>Staphylococcus epidermidis</i> | 95.52  |

|                                           |        |
|-------------------------------------------|--------|
| <i>Rothia koreensis</i>                   | 1.89   |
| <i>Corynebacterium tuberculostearicum</i> | 1.02   |
| <i>Corynebacterium massiliense</i>        | 0.32   |
| <i>Dermabacter vaginalis</i>              | 0.31   |
| <i>Anaerococcus senegalensis</i>          | 0.31   |
| <i>Corynebacterium falsenii</i>           | 0.18   |
| <i>Anaerococcus octavius</i>              | 0.04   |
| <i>Nosocomiicoccus massiliensis</i>       | 0.04   |
| <i>Streptococcus periodonticum</i>        | 0.04   |
| <i>Corynebacterium ihumii</i>             | 0.03   |
| <i>Pseudoglutamicibacter cumminsii</i>    | 0.02   |
| <i>Propioniferax innocua</i>              | 0.02   |
| <i>Peptoniphilus olsenii</i>              | 0.02   |
| <i>Corynebacterium urealyticum</i>        | 0.02   |
| <i>Fingoldia magna</i>                    | 0.02   |
| <i>Corynebacterium frankenforstense</i>   | 0.02   |
| <i>Brevibacterium paucivorans</i>         | 0.02   |
| <i>Porphyromonas pasteri</i>              | 0.02   |
| <i>Peptoniphilus ivorii</i>               | 0.02   |
| <i>Aerococcus urinae</i>                  | 0.01   |
| <i>Peptoniphilus grossensis</i>           | 0.01   |
| <i>Leptotrichia wadei</i>                 | 0.01   |
| <i>Corynebacterium pyruviciproducens</i>  | 0.01   |
| <i>Gemmiger formicilis</i>                | 0.01   |
| <i>Anaerococcus urinomassiliensis</i>     | 0.01   |
| <i>Neisseria elongata</i>                 | 0.01   |
| <i>Corynebacterium bovis</i>              | 0.01   |
| <i>Corynebacterium riegelii</i>           | 0.01   |
| <i>Brevibacterium sediminis</i>           | 0.01   |
| <i>Bacteroides ovatus</i>                 | 0.01   |
| <i>Staphylococcus argensis</i>            | 0.01   |
| <i>Staphylococcus simulans</i>            | 0.01   |
| <i>Blautia wexlerae</i>                   | 0.01   |
| <i>Erwinia persicina</i>                  | 0.01   |
| Unidentified                              | 0.01   |
| Miscellaneous unidentified                | 0.03   |
| Total                                     | 100.00 |

## Nail 6

| Nail 6 16S                        | Hits % |
|-----------------------------------|--------|
| <i>Staphylococcus epidermidis</i> | 36.70  |

|                                           |       |
|-------------------------------------------|-------|
| <i>Corynebacterium ihumii</i>             | 32.73 |
| <i>Corynebacterium tuberculostearicum</i> | 8.47  |
| <i>Anaerococcus octavius</i>              | 4.53  |
| <i>Anaerococcus urinomassiliensis</i>     | 2.58  |
| <i>Finegoldia magna</i>                   | 2.21  |
| <i>Dermabacter vaginalis</i>              | 2.08  |
| <i>Facklamia languida</i>                 | 1.48  |
| <i>Anaerococcus provencensis</i>          | 1.40  |
| <i>Alloiococcus otitis</i>                | 1.19  |
| <i>Salinicoccus salitudinis</i>           | 1.19  |
| <i>Peptoniphilus ivorii</i>               | 1.07  |
| <i>Corynebacterium jeikeium</i>           | 0.79  |
| <i>Helcococcus kunzii</i>                 | 0.67  |
| <i>Psychrobacter faecalis</i>             | 0.45  |
| <i>Peptoniphilus olsenii</i>              | 0.41  |
| <i>Corynebacterium frankenforstense</i>   | 0.39  |
| <i>Anaerococcus senegalensis</i>          | 0.33  |
| <i>Peptoniphilus obesi</i>                | 0.17  |
| <i>Micrococcus luteus</i>                 | 0.17  |
| <i>Eremococcus coleocola</i>              | 0.12  |
| <i>Nesterenkonia halophila</i>            | 0.12  |
| <i>Propioniferax innocua</i>              | 0.11  |
| <i>Ignavigranum ruoffiae</i>              | 0.11  |
| <i>Jeotgalicoccus huakuii</i>             | 0.10  |
| <i>Atopostipes suicloacalis</i>           | 0.09  |
| <i>Salinicoccus qingdaonensis</i>         | 0.05  |
| <i>Moraxella osloensis</i>                | 0.04  |
| <i>Brevibacterium sediminis</i>           | 0.04  |
| <i>Brevibacterium paucivorans</i>         | 0.03  |
| <i>Clavibacter michiganensis</i>          | 0.03  |
| <i>Rothia koreensis</i>                   | 0.03  |
| <i>Sinomonas flava</i>                    | 0.03  |
| <i>Staphylococcus argensis</i>            | 0.02  |
| <i>Aliicoccus persicus</i>                | 0.02  |
| <i>Corynebacterium bovis</i>              | 0.01  |
| <i>Brachybacterium faecium</i>            | 0.01  |
| <i>Kytococcus sedentarius</i>             | 0.01  |
| <i>Corynebacterium massiliense</i>        | 0.01  |
| <i>Dietzia timorensis</i>                 | 0.01  |
| <i>Rubrobacter xylanophilus</i>           | 0.01  |
| <i>Faecalibacterium prausnitzii</i>       | 0.01  |
| Miscellaneous unidentified                | 0.02  |

|       |        |
|-------|--------|
| Total | 100.00 |
|-------|--------|

## Nail 7

| Nail 7 16S                                | Hits % |
|-------------------------------------------|--------|
| <i>Staphylococcus epidermidis</i>         | 89.85  |
| <i>Rothia koreensis</i>                   | 8.47   |
| <i>Acinetobacter tjernbergiae</i>         | 0.63   |
| <i>Acinetobacter guillouiae</i>           | 0.45   |
| <i>Moraxella osloensis</i>                | 0.16   |
| <i>Cutibacterium acnes</i>                | 0.10   |
| <i>Corynebacterium tuberculostearicum</i> | 0.09   |
| <i>Escherichia fergusonii</i>             | 0.04   |
| <i>Rubrobacter xylanophilus</i>           | 0.04   |
| <i>Corynebacterium resistens</i>          | 0.02   |
| <i>Corynebacterium jeikeium</i>           | 0.02   |
| <i>Corynebacterium ihumii</i>             | 0.01   |
| <i>Clavibacter michiganensis</i>          | 0.01   |
| <i>Corynebacterium massiliense</i>        | 0.01   |
| <i>Brevibacterium sediminis</i>           | 0.01   |
| <i>Corynebacterium bovis</i>              | 0.01   |
| <i>Corynebacterium amycolatum</i>         | 0.01   |
| <i>Acinetobacter ursingii</i>             | 0.01   |
| <i>Brevibacterium paucivorans</i>         | 0.01   |
| <i>Faecalibacterium prausnitzii</i>       | 0.01   |
| <i>Anaerococcus octavius</i>              | 0.01   |
| Miscellaneous unidentified                | 0.04   |
| Total                                     | 100.00 |

## Nail 8

| Nail 8 16S                                | Hits % |
|-------------------------------------------|--------|
| <i>Staphylococcus epidermidis</i>         | 39.50  |
| <i>Brevibacterium sediminis</i>           | 16.86  |
| <i>Corynebacterium tuberculostearicum</i> | 16.83  |
| <i>Rothia koreensis</i>                   | 13.95  |
| <i>Corynebacterium jeikeium</i>           | 4.54   |
| <i>Dermabacter vaginalis</i>              | 2.44   |
| <i>Brevibacterium paucivorans</i>         | 1.68   |
| <i>Dietzia timorensis</i>                 | 0.96   |
| <i>Corynebacterium massiliense</i>        | 0.87   |
| <i>Corynebacterium resistens</i>          | 0.64   |

|                                         |        |
|-----------------------------------------|--------|
| <i>Anaerococcus octavius</i>            | 0.51   |
| <i>Propioniferax innocua</i>            | 0.36   |
| <i>Corynebacterium ihumii</i>           | 0.28   |
| <i>Streptomyces eurythermus</i>         | 0.28   |
| <i>Clavibacter michiganensis</i>        | 0.06   |
| <i>Facklamia languida</i>               | 0.05   |
| <i>Brachybacterium faecium</i>          | 0.04   |
| <i>Anaerococcus nagya</i>               | 0.04   |
| <i>Kocuria uropygioeca</i>              | 0.02   |
| <i>Corynebacterium frankenforstense</i> | 0.02   |
| <i>Corynebacterium falsenii</i>         | 0.01   |
| <i>Brevibacterium luteolum</i>          | 0.01   |
| <i>Peptoniphilus ivorii</i>             | 0.01   |
| <i>Corynebacterium bovis</i>            | 0.01   |
| <i>Eremococcus coleocola</i>            | 0.01   |
| <i>Ignavigranum ruoffiae</i>            | 0.01   |
| <i>Finegoldia magna</i>                 | 0.01   |
| Miscellaneous unidentified              | 0.02   |
| Total                                   | 100.00 |

## Nail 9

| <b>Nail 9 16S</b>                         | <b>Hits %</b> |
|-------------------------------------------|---------------|
| <i>Staphylococcus epidermidis</i>         | 66.32         |
| <i>Rothia koreensis</i>                   | 13.76         |
| <i>Corynebacterium tuberculostearicum</i> | 7.96          |
| <i>Corynebacterium jeikeium</i>           | 4.60          |
| <i>Corynebacterium massiliense</i>        | 2.07          |
| <i>Brevibacterium paucivorans</i>         | 1.19          |
| <i>Peptoniphilus olsenii</i>              | 0.92          |
| <i>Finegoldia magna</i>                   | 0.85          |
| <i>Propioniferax innocua</i>              | 0.50          |
| <i>Peptoniphilus ivorii</i>               | 0.44          |
| <i>Dermabacter vaginalis</i>              | 0.44          |
| <i>Corynebacterium frankenforstense</i>   | 0.40          |
| <i>Anaerococcus octavius</i>              | 0.24          |
| <i>Facklamia languida</i>                 | 0.07          |
| <i>Ignavigranum ruoffiae</i>              | 0.04          |
| <i>Corynebacterium bovis</i>              | 0.03          |
| <i>Helcococcus kunzii</i>                 | 0.03          |
| Other                                     | 0.03          |
| <i>Moraxella osloensis</i>                | 0.02          |

|                                         |        |
|-----------------------------------------|--------|
| <i>Anaerococcus provencensis</i>        | 0.02   |
| <i>Alkalibacterium putridalginicola</i> | 0.01   |
| <i>Ercella succinigenes</i>             | 0.01   |
| <i>Anaerococcus senegalensis</i>        | 0.01   |
| <i>Corynebacterium falsenii</i>         | 0.01   |
| <i>Streptococcus periodonticum</i>      | 0.01   |
| <i>Anaerococcus nagyae</i>              | 0.01   |
| Miscellaneous unidentified              | 0.02   |
| Total                                   | 100.00 |

## Nail 10

| <b>Nail 10 16S</b>                        | <b>Hits %</b> |
|-------------------------------------------|---------------|
| <i>Staphylococcus epidermidis</i>         | 77.79         |
| <i>Corynebacterium massiliense</i>        | 12.37         |
| <i>Corynebacterium bovis</i>              | 2.72          |
| <i>Corynebacterium tuberculostearicum</i> | 1.56          |
| <i>Anaerococcus octavius</i>              | 1.46          |
| <i>Anaerococcus nagyae</i>                | 1.08          |
| <i>Aerococcus sanguinicola</i>            | 1.07          |
| <i>Rothia koreensis</i>                   | 1.05          |
| <i>Anaerococcus urinomassiliensis</i>     | 0.11          |
| <i>Finegoldia magna</i>                   | 0.08          |
| <i>Moraxella osloensis</i>                | 0.06          |
| <i>Rubrobacter xylanophilus</i>           | 0.06          |
| <i>Corynebacterium amycolatum</i>         | 0.05          |
| <i>Peptoniphilus olsenii</i>              | 0.04          |
| <i>Streptococcus thermophilus</i>         | 0.04          |
| <i>Peptoniphilus grossensis</i>           | 0.04          |
| <i>Deinococcus fonticola</i>              | 0.03          |
| <i>Blautia wexlerae</i>                   | 0.03          |
| <i>Methylobacterium populi</i>            | 0.02          |
| <i>Akkermansia muciniphila</i>            | 0.02          |
| <i>Brevibacterium paucivorans</i>         | 0.02          |
| <i>Staphylococcus argensis</i>            | 0.02          |
| <i>Monoglobus pectinilyticus</i>          | 0.02          |
| <i>Lachnospira eligens</i>                | 0.02          |
| <i>Gemmiger formicilis</i>                | 0.02          |
| <i>Peptoniphilus ivorii</i>               | 0.02          |
| <i>Escherichia fergusonii</i>             | 0.02          |
| <i>Phocaeicola dorei</i>                  | 0.01          |

|                                         |        |
|-----------------------------------------|--------|
| <i>Streptococcus periodonticum</i>      | 0.01   |
| <i>Corynebacterium frankenforstense</i> | 0.01   |
| <i>Corynebacterium ihumii</i>           | 0.01   |
| <i>Petrocella atlantisensis</i>         | 0.01   |
| <i>Brevibacterium sediminis</i>         | 0.01   |
| <i>Cutibacterium acnes</i>              | 0.01   |
| <i>Bacteroides uniformis</i>            | 0.01   |
| <i>Coprococcus comes</i>                | 0.01   |
| [ <i>Clostridium</i> ] <i>scindens</i>  | 0.01   |
| <i>Holdemanella biformis</i>            | 0.01   |
| <i>Dialister invisus</i>                | 0.01   |
| <i>Methylobacterium bullatum</i>        | 0.01   |
| <i>Altererythrobacter dongtanensis</i>  | 0.01   |
| <i>Neisseria mucosa</i>                 | 0.01   |
| <i>Corynebacterium glyciniphilum</i>    | 0.01   |
| <i>Pseudoglutamicibacter cumminsii</i>  | 0.01   |
| <i>Enterococcus hirae</i>               | 0.01   |
| <i>Peptoniphilus lacrimalis</i>         | 0.01   |
| Miscellaneous unidentified              | 0.03   |
| Total                                   | 100.00 |

## Nail 11

| <b>Nail 11. (Control 1) 16S</b>           | <b>Hits %</b> |
|-------------------------------------------|---------------|
| <i>Staphylococcus epidermidis</i>         | 80.34         |
| <i>Rothia koreensis</i>                   | 10.78         |
| <i>Corynebacterium tuberculostearicum</i> | 8.86          |
| <i>Moraxella osloensis</i>                | 0.01          |
| Miscellaneous unidentified                | 0.02          |
| Total                                     | 100.00        |

## Nail 12

| <b>Nail 12 16S</b>                        | <b>Hits %</b> |
|-------------------------------------------|---------------|
| <i>Staphylococcus epidermidis</i>         | 55.96         |
| <i>Rothia koreensis</i>                   | 30.94         |
| <i>Brevibacterium sediminis</i>           | 4.65          |
| <i>Corynebacterium tuberculostearicum</i> | 4.30          |
| <i>Corynebacterium massiliense</i>        | 1.92          |
| <i>Corynebacterium jeikeium</i>           | 0.68          |
| <i>Dermabacter vaginalis</i>              | 0.68          |
| <i>Peptoniphilus Olsenii</i>              | 0.28          |



|                                   |        |
|-----------------------------------|--------|
| <i>Corynebacterium resistens</i>  | 0.21   |
| <i>Anaerococcus octavius</i>      | 0.10   |
| <i>Moraxella osloensis</i>        | 0.07   |
| <i>Dietzia timorensis</i>         | 0.06   |
| <i>Clavibacter michiganensis</i>  | 0.02   |
| <i>Nesterenkonia cremea</i>       | 0.02   |
| <i>Brevibacterium paucivorans</i> | 0.02   |
| <i>Finegoldia magna</i>           | 0.02   |
| <i>Cutibacterium acnes</i>        | 0.01   |
| <i>Kocuria uropygioeca</i>        | 0.01   |
| Other                             | 0.01   |
| <i>Micrococcus luteus</i>         | 0.01   |
| <i>Rubrobacter xylanophilus</i>   | 0.01   |
| Miscellaneous unidentified        | 0.03   |
| Total                             | 100.00 |

## Nail 13

| <b>Nail 13 16S</b>                        | <b>Hits %</b> |
|-------------------------------------------|---------------|
| <i>Staphylococcus epidermidis</i>         | 48.84         |
| <i>Rothia koreensis</i>                   | 15.06         |
| <i>Corynebacterium tuberculostearicum</i> | 7.57          |
| <i>Corynebacterium jeikeium</i>           | 5.65          |
| <i>Sphingobacterium daejeonense</i>       | 5.27          |
| <i>Brevibacterium paucivorans</i>         | 3.57          |
| <i>Dermabacter vaginalis</i>              | 3.51          |
| <i>Clavibacter michiganensis</i>          | 3.35          |
| <i>Brevibacterium sediminis</i>           | 3.28          |
| <i>Ignavigranum ruoffiae</i>              | 0.93          |
| <i>Corynebacterium glyciniphilum</i>      | 0.75          |
| <i>Corynebacterium resistens</i>          | 0.53          |
| <i>Dietzia timorensis</i>                 | 0.32          |
| <i>Anaerococcus octavius</i>              | 0.32          |
| <i>Corynebacterium bovis</i>              | 0.22          |
| <i>Anaerococcus urinomassiliensis</i>     | 0.19          |
| <i>Micrococcus luteus</i>                 | 0.17          |
| <i>Propioniferax innocua</i>              | 0.17          |
| <i>Sphingobacterium hotanense</i>         | 0.10          |
| <i>Corynebacterium massiliense</i>        | 0.04          |
| <i>Moraxella osloensis</i>                | 0.03          |
| <i>Dermacoccus profundi</i>               | 0.02          |
| <i>Staphylococcus lentus</i>              | 0.02          |

|                                    |        |
|------------------------------------|--------|
| <i>Corynebacterium aurimucosum</i> | 0.01   |
| <i>Gordonia hongkongensis</i>      | 0.01   |
| <i>Brachybacterium faecium</i>     | 0.01   |
| <i>Gulosibacter chungangensis</i>  | 0.01   |
| <i>Staphylococcus pasteurii</i>    | 0.01   |
| <i>Finegoldia magna</i>            | 0.01   |
| <i>Brevundimonas albigilva</i>     | 0.01   |
| Miscellaneous unidentified         | 0.02   |
| Total                              | 100.00 |

## Nail 14

| <b>Nail 14 16S</b>                        | <b>Hits %</b> |
|-------------------------------------------|---------------|
| <i>Staphylococcus epidermidis</i>         | 99.14         |
| <i>Corynebacterium ihumii</i>             | 0.56          |
| <i>Corynebacterium tuberculostearicum</i> | 0.07          |
| <i>Corynebacterium riegelii</i>           | 0.05          |
| <i>Micrococcus luteus</i>                 | 0.05          |
| <i>Corynebacterium massiliense</i>        | 0.02          |
| <i>Moraxella osloensis</i>                | 0.01          |
| <i>Rubrobacter xylanophilus</i>           | 0.01          |
| <i>Cutibacterium acnes</i>                | 0.01          |
| <i>Ezakiella coagulans</i>                | 0.01          |
| <i>Mycolicibacterium obuense</i>          | 0.01          |
| <i>Porphyromonas pasteri</i>              | 0.01          |
| Miscellaneous unidentified                | 0.04          |
| Total                                     | 100.00        |

## Nail 15

| <b>Nail 15 16S</b>                        | <b>Hits %</b> |
|-------------------------------------------|---------------|
| <i>Staphylococcus epidermidis</i>         | 80.41         |
| <i>Rothia koreensis</i>                   | 17.85         |
| <i>Corynebacterium bovis</i>              | 0.90          |
| <i>Corynebacterium jeikeium</i>           | 0.26          |
| <i>Dermabacter vaginalis</i>              | 0.21          |
| <i>Dermacoccus profundi</i>               | 0.18          |
| <i>Corynebacterium tuberculostearicum</i> | 0.06          |
| <i>Cutibacterium acnes</i>                | 0.02          |
| <i>Finegoldia magna</i>                   | 0.02          |
| <i>Moraxella osloensis</i>                | 0.02          |
| <i>Rubrobacter xylanophilus</i>           | 0.01          |

|                                   |        |
|-----------------------------------|--------|
| <i>Corynebacterium amycolatum</i> | 0.01   |
| <i>Corynebacterium ihumii</i>     | 0.01   |
| <i>Methylobacterium bullatum</i>  | 0.01   |
| Miscellaneous unidentified        | 0.02   |
| Total                             | 100.00 |

## Nail 16

| Nail 16 16S                       | Hits % |
|-----------------------------------|--------|
| <i>Staphylococcus epidermidis</i> | 56.95  |
| <i>Rothia koreensis</i>           | 42.11  |
| <i>Dermabacter vaginalis</i>      | 0.47   |
| <i>Staphylococcus lentus</i>      | 0.23   |
| <i>Brevibacterium sediminis</i>   | 0.15   |
| <i>Dietzia timorensis</i>         | 0.03   |
| <i>Brevibacterium paucivorans</i> | 0.02   |
| <i>Corynebacterium jeikeium</i>   | 0.01   |
| <i>Clavibacter michiganensis</i>  | 0.01   |
| <i>Staphylococcus pasteurii</i>   | 0.01   |
| Miscellaneous unidentified        | 0.01   |
| Total                             | 100.00 |

## Nail 17

| Nail 17 16S                               | Hits % |
|-------------------------------------------|--------|
| <i>Staphylococcus epidermidis</i>         | 54.13  |
| <i>Rothia koreensis</i>                   | 23.33  |
| <i>Corynebacterium tuberculostearicum</i> | 6.28   |
| <i>Dermabacter vaginalis</i>              | 3.52   |
| <i>Brevibacterium sediminis</i>           | 3.51   |
| <i>Anaerococcus octavius</i>              | 3.17   |
| <i>Corynebacterium massiliense</i>        | 2.21   |
| <i>Corynebacterium resistens</i>          | 1.06   |
| <i>Dermacoccus profundi</i>               | 1.02   |
| <i>Peptoniphilus olsenii</i>              | 0.53   |
| <i>Brevibacterium paucivorans</i>         | 0.32   |
| <i>Facklamia languida</i>                 | 0.32   |
| <i>Dietzia timorensis</i>                 | 0.15   |
| <i>Staphylococcus lentus</i>              | 0.13   |
| <i>Corynebacterium frankenforstense</i>   | 0.10   |
| <i>Moraxella osloensis</i>                | 0.07   |
| <i>Clavibacter michiganensis</i>          | 0.03   |

|                                   |        |
|-----------------------------------|--------|
| <i>Corynebacterium bovis</i>      | 0.02   |
| <i>Brachybacterium faecium</i>    | 0.02   |
| <i>Helcobacillus massiliensis</i> | 0.01   |
| Other                             | 0.01   |
| <i>Brevundimonas albigilva</i>    | 0.01   |
| <i>Micrococcus luteus</i>         | 0.01   |
| <i>Rubrobacter xylanophilus</i>   | 0.01   |
| <i>Bacillus velezensis</i>        | 0.01   |
| <i>Anaerococcus prevotii</i>      | 0.01   |
| Miscellaneous unidentified        | 0.02   |
| Total                             | 100.00 |

## Nail 18

| Nail 18 16S                               | Hits % |
|-------------------------------------------|--------|
| <i>Staphylococcus epidermidis</i>         | 71.85  |
| <i>Rothia koreensis</i>                   | 16.73  |
| <i>Corynebacterium jeikeium</i>           | 3.03   |
| <i>Brevibacterium paucivorans</i>         | 2.00   |
| <i>Corynebacterium tuberculostearicum</i> | 1.35   |
| <i>Corynebacterium massiliense</i>        | 1.32   |
| <i>Corynebacterium resistens</i>          | 1.14   |
| <i>Corynebacterium bovis</i>              | 1.05   |
| <i>Corynebacterium amycolatum</i>         | 0.56   |
| <i>Pseudoglutamicibacter cumminsii</i>    | 0.52   |
| <i>Diplorickettsia massiliensis</i>       | 0.12   |
| [ <i>Pseudomonas</i> ] <i>geniculata</i>  | 0.09   |
| <i>Staphylococcus argensis</i>            | 0.04   |
| <i>Brevibacterium sediminis</i>           | 0.03   |
| <i>Propioniferax innocua</i>              | 0.03   |
| <i>Staphylococcus simulans</i>            | 0.03   |
| <i>Acinetobacter tjernbergiae</i>         | 0.02   |
| <i>Anaerococcus octavius</i>              | 0.01   |
| <i>Moraxella osloensis</i>                | 0.01   |
| <i>Ezakiella massiliensis</i>             | 0.01   |
| <i>Pseudomonas soli</i>                   | 0.01   |
| <i>Corynebacterium frankenforstense</i>   | 0.01   |
| <i>Corynebacterium freiburgense</i>       | 0.01   |
| <i>Dermabacter vaginalis</i>              | 0.01   |
| <i>Finegoldia magna</i>                   | 0.01   |
| <i>Peptoniphilus obesi</i>                | 0.01   |
| Miscellaneous unidentified                | 0.02   |

|       |        |
|-------|--------|
| Total | 100.00 |
|-------|--------|

## Nail 19

| Nail 19 16S                               | Hits % |
|-------------------------------------------|--------|
| <i>Moraxella osloensis</i>                | 34.58  |
| <i>Rothia koreensis</i>                   | 14.80  |
| <i>Brevibacterium sediminis</i>           | 11.79  |
| <i>Deinococcus fonticola</i>              | 7.11   |
| <i>Corynebacterium resistens</i>          | 6.94   |
| <i>Staphylococcus epidermidis</i>         | 5.45   |
| <i>Deinococcus proteolyticus</i>          | 4.63   |
| <i>Dermabacter vaginalis</i>              | 4.62   |
| <i>Deinococcus taklimakanensis</i>        | 2.83   |
| <i>Corynebacterium bovis</i>              | 1.41   |
| <i>Dietzia timorensis</i>                 | 1.36   |
| <i>Brevundimonas albigilva</i>            | 1.22   |
| <i>Finegoldia magna</i>                   | 1.08   |
| <i>Brevibacterium paucivorans</i>         | 0.66   |
| <i>Staphylococcus lentus</i>              | 0.49   |
| <i>Clavibacter michiganensis</i>          | 0.42   |
| <i>Corynebacterium jeikeium</i>           | 0.11   |
| <i>Roseomonas gilardii</i>                | 0.09   |
| <i>Lysobacter oculi</i>                   | 0.09   |
| <i>Anaerococcus octavius</i>              | 0.08   |
| <i>Ignavigranum ruoffiae</i>              | 0.05   |
| <i>Gordonia hongkongensis</i>             | 0.04   |
| <i>Dermacoccus profundi</i>               | 0.04   |
| <i>Facklamia languida</i>                 | 0.04   |
| <i>Corynebacterium tuberculostearicum</i> | 0.02   |
| <i>Corynebacterium amycolatum</i>         | 0.01   |
| <i>Cutibacterium acnes</i>                | 0.01   |
| <i>Propioniferax innocua</i>              | 0.01   |
| [ <i>Pseudomonas</i> ] <i>geniculata</i>  | 0.01   |
| Miscellaneous unidentified                | 0.01   |
| Total                                     | 100.00 |

## Nail 20

| Nail 20 (Control 2) 16S           | Hits % |
|-----------------------------------|--------|
| <i>Staphylococcus epidermidis</i> | 95.20  |
| <i>Rothia koreensis</i>           | 3.10   |

|                                           |        |
|-------------------------------------------|--------|
| <i>Corynebacterium massiliense</i>        | 0.58   |
| <i>Corynebacterium resistens</i>          | 0.45   |
| <i>Corynebacterium tuberculostearicum</i> | 0.14   |
| <i>Moraxella osloensis</i>                | 0.11   |
| <i>Anaerococcus octavius</i>              | 0.10   |
| <i>Corynebacterium bovis</i>              | 0.06   |
| <i>Finegoldia magna</i>                   | 0.05   |
| <i>Brevibacterium paucivorans</i>         | 0.05   |
| <i>Rubrobacter xylanophilus</i>           | 0.03   |
| <i>Dermabacter vaginalis</i>              | 0.02   |
| <i>Corynebacterium jeikeium</i>           | 0.02   |
| <i>Peptoniphilus grossensis</i>           | 0.01   |
| <i>Haematomicrobium sanguinis</i>         | 0.01   |
| <i>Streptococcus periodonticum</i>        | 0.01   |
| <i>Brevibacterium sediminis</i>           | 0.01   |
| <i>Corynebacterium ihumii</i>             | 0.01   |
| <i>Cutibacterium acnes</i>                | 0.01   |
| <i>Streptococcus anginosus</i>            | 0.01   |
| <i>Veillonella dispar</i>                 | 0.01   |
| <i>Peptoniphilus ivorii</i>               | 0.01   |
| <i>Peptoniphilus olsenii</i>              | 0.01   |
| <i>Brevundimonas albigilva</i>            | 0.01   |
| Miscellaneous unidentified                | 0.02   |
| Total                                     | 100.00 |
