# Supplementary material for: Metagenomics of Toenail Onychomycosis in Three Victorian Regions of Australia
Source: J Fungi (Basel). 2022 Nov 14;8(11):1198. doi: 10.3390/jof8111198 (PMC9698484; doi:10.3390/jof8111198)
Supplement: Supplementary file 1 [file jof-08-01198-s001.zip]

Archive with 4 entries (4 files):
- jof-1972601-Supplementary.pdf
- Supplementary Table S2 ITS2.pdf
- Supplementary Table S3 16S docx.pdf
- Supplementary Tables S1, S4, S5, S6. docx.pdf
